1 **A Heat Stress Responsive NAC Transcription Factor Heterodimer Plays Key**  
2 **Roles in Rice Grain Filling**

3

4 Ye Ren, Zhouquan Huang, Hao Jiang, Zhuo Wang, Fengsheng Wu, Yufei Xiong,  
5 Jialing Yao \*

6

7 College of Life Science and Technology, Huazhong Agricultural University, Wuhan  
8 430070, China.

9

10 \* Corresponding author: Jialing Yao: [yaojlmy@mail.hzau.edu.cn](mailto:yaojlmy@mail.hzau.edu.cn), Tel: 86-27-87282866

11

12 **Running title:** ONAC127 and ONAC129 regulate rice grain filling

13 **Highlight:** A NAC transcription factor heterodimer plays vital roles in heat stress  
14 response and sugar transportation at rice grain filling stage.

15

16

17 **Abstract**

18 High temperature often leads to the failure of grain filling in rice (*Oryza sativa*) to cause  
19 yield loss, while the mechanism is not well elucidated yet. Here, we report that two  
20 seed-specific NAM/ATAF/CUC domain transcription factors, *ONAC127* and  
21 *ONAC129*, are responsive to heat stress and involved in the grain filling process of rice.  
22 *ONAC127* and *ONAC129* are dominantly expressed in the pericarp and can form a  
23 heterodimer during rice grain filling. CRISPR/Cas9 induced mutants and  
24 overexpression lines were then generated to investigate the functions of these two  
25 transcription factors. Interestingly, both knock-out and overexpression plants showed  
26 incomplete grain filling and shrunken grains, which became more severe under heat  
27 stress. Transcriptome analysis revealed that *ONAC127* and *ONAC129* mainly regulate  
28 stimulus response and nutrient transport. CHIP-seq analysis identified that the direct  
29 targets of *ONAC127* and *ONAC129* in developing rice seeds include monosaccharide  
30 transporter *OsMST6*, sugar transporter *OsSWEET4*, calmodulin-like protein *OsMSR2*  
31 and AP2/ERF factor *OsEATB*. These results suggest that *ONAC127* and *ONAC129* may  
32 regulate grain filling through affecting sugar transportation and abiotic stress responses.  
33 Overall, this study demonstrates a transcriptional regulatory network involving  
34 *ONAC127* and *ONAC129* and coordinating multiple pathways to modulate seed  
35 development and heat stress response at rice reproductive stage.

36

37 **Key words:** Apoplasmic pathway; Seed-specific expression; Heat stress response;  
38 Heterodimer; NAC transcription factor; *Oryza sativa* ssp. *Japonica*; Rice grain filling;  
39 Sugar transportation; Transcriptional regulation

40

41 **Abbreviations:** Day after pollination (DAP); NAC (NAM, ATAF1/2, CUC2); NAC  
42 repression domain (NARD); Potential target genes (PTGs); Transcription factor (TF);  
43 Zhonghua11 (ZH11)

## 44 **Introduction**

45 Rice (*Oryza sativa*) seed development initiates from a fertilized ovary and ends  
46 with a dehydrated, hard and transparent grain, which can be divided into three stages  
47 including cell division, organogenesis and maturation (Agarwal *et al.*, 2011). A rice  
48 seed is mainly composed of endosperm with abundant starch grains, and starch  
49 biosynthesis is closely related to the transport of carbohydrate from leaves to seeds via  
50 the phloem (Patrick, 1997). The dorsal vascular bundles that pass through the pericarp  
51 are the main nutrient transport tissue in rice seeds (Oparka and Gates, 1981), while they  
52 are not connected to the endosperm (Hoshikawa, 1984). Hence, the apoplasmic  
53 pathway is the only channel for nutrients to reach the starchy endosperm (Matsuda *et*  
54 *al.*, 1979).

55 Carbohydrates may directly enter the nucellar epidermis through plasmodesmata,  
56 and then be transported to the apoplasmic space under the action of Sugar Will  
57 Eventually Be Exported Transporters (OsSWEETs) and partially hydrolyzed into  
58 monosaccharides by cell wall invertase OsCINs. The monosaccharides are then  
59 transported into the aleurone layer mainly by monosaccharide transporter OsMSTs,  
60 while the rest un-hydrolyzed sucrose is directly transported into the aleurone layer by  
61 the sucrose transporter OsSUTs (Yang *et al.*, 2018). The nutrient transport is also  
62 regulated by a range of transcription factors (TFs) such as *OsNF-YB1* and *OsNF-YC12*,  
63 which activate the expression of OsSUTs to capture the leaked sucrose in the  
64 apoplasmic space. Knockout of *NF-YB1* or *OsNF-YC12* led to defective grains with  
65 chalky endosperms, and a similar phenotype was also observed in the mutant of  
66 *OsSUT1* (Bai *et al.*, 2016, Xiong *et al.*, 2019).

67 The nutrient transport processes in the seed are highly susceptible to variations in  
68 environmental conditions, and extreme external stimuli (especially extreme  
69 temperature) during the grain-filling stage can lead to a nearly 50% reduction in rice  
70 yield (Hu and Xiong, 2014). Plants respond to unexpectedly high temperature through  
71 some stress-specific signaling pathways. During heat stress signal transduction, the heat

72 shock transcription factors (HSFs) will be activated to regulate the expression of  
73 downstream heat shock proteins (HSPs) and other stress-related genes. For example,  
74 AP2/EREBP TF *DREB2A* can activate a heat shock TF *hsfA3* under heat stress to induce  
75 the expression of specific HSPs (Schramm *et al.*, 2008). Similarly, the expression of  
76 *OsZIP60*, which plays important roles in moisture retention and heat-damage  
77 resistance, is induced under heat stress and endoplasmic reticulum stress (Oono *et al.*,  
78 2010). Although several proteins related to plant heat stress response have been found  
79 and characterized, the mechanisms of the heat stress response are still poorly  
80 understood.

81 NAC (NAM, ATAF1/2, CUC2) TFs are one of the largest family of plant specific  
82 TFs with 151 members in rice (Nuruzzaman *et al.*, 2010). The typical structure of NAC  
83 TFs is a conserved NAC domain with about 150 amino acids in the N-terminus, and a  
84 variable transcriptional regulation region in the C-terminus (Christianson *et al.*, 2010).  
85 The NAC domain can be further subdivided into five subdomains [A-E], among which  
86 the subdomains C and D are highly conserved and may mainly act in DNA binding  
87 (Ooka *et al.*, 2003). In addition, the subdomain D of some NAC proteins contains a  
88 hydrophobic NAC repression domain (NARD), which can suppress the transcriptional  
89 activity of NAC TFs by suppressing their DNA-binding ability or nuclear localization  
90 ability. As a specific functional motif in NARD, LVFY can suppress the activity of both  
91 NAC TFs and other TFs by its hydrophobicity (Hao *et al.*, 2010).

92 NAC TFs are involved in many biological processes in plants such as organ  
93 development, secondary wall synthesis, and stress response. For instance, *NAC29* and  
94 *NAC31* regulate the downstream cellulose synthase (CESA) by activating the  
95 downstream TF *MYB61* to control the synthesis of secondary wall (Huang *et al.*, 2015).  
96 For response to stresses, especially abiotic stresses, the NAC TFs are dominant  
97 regulators. *RD26* gene is the first NAC TF identified as a regulator of abscisic acid  
98 (ABA) and jasmonate (JA) signaling during stress response in Arabidopsis (Fujita *et*  
99 *al.*, 2004). *SNAC1* is a stress-responsive NAC TF that confers drought tolerance to rice

100 by closing stomata (Hu *et al.*, 2006), and *SNAC3* confers heat and drought tolerance  
101 through regulating reactive oxygen species (Fang *et al.*, 2015). *OsNAC2* was also  
102 reported to be involved in drought stress response mediated by ABA (Shen *et al.*,  
103 2017b); besides, it plays divergent roles in different biological processes, such as  
104 regulating shoot branching (Mao *et al.*, 2007) and plant height and flowering time  
105 through mediating the gibberellic acid (GA) pathway (Chen *et al.*, 2015). *VNI2* is a  
106 bifunctional NAC TF reported as a transcriptional repressor of xylem vessel formation  
107 in Arabidopsis (Yamaguchi *et al.*, 2010), but the transcriptional activator activity of  
108 *VNI2* is induced under high salinity stress to regulate the leaf longevity (Yang *et al.*,  
109 2011).

110 Nine seed-specific NAC TFs have been found through transcriptome analysis in  
111 rice (Mathew *et al.*, 2016). Here, four of these genes, *ONAC025*, *ONAC127*, *ONAC128*  
112 and *ONAC129*, which are located in the linked region of chromosome 11 and identified  
113 as a gene cluster, were selected for further analysis (Fang *et al.*, 2008). A recent study  
114 implied that two NAC TFs specifically expressed in maize seeds, *ZmNAC128* and  
115 *ZmNAC130*, play critical roles in starch and protein accumulation during grain filling  
116 (Zhang *et al.*, 2019). We therefore inferred that the four NAC TFs might also be  
117 involved in some important processes in rice seed development. To be more specific,  
118 we selected *ONAC127* and *ONAC129* from the four genes for study, which could form  
119 a heterodimer and participate in apoplasmic transport and heat stress response to  
120 regulate rice grain filling. The findings are expected to improve the understanding of  
121 the regulatory network of stress response and grain filling in rice.

## 122 **Materials and methods**

### 123 *Generation of transgenic plants and growth conditions*

124 For the generation of CRISPR mutants, the web-based tool CRISPR-P v2.0  
125 (<http://cbi.hzau.edu.cn/CRISPR2/>) (Liu *et al.*, 2017) was used to obtain the specific  
126 gRNA cassettes targeting *ONAC127* and *ONAC129*, which were then cloned into a

127 binary vector pYLCRISPR/Cas9-MH (Ma *et al.*, 2015). For overexpression plants, the  
128 stop-code-less cDNA fragments of *ONAC127* and *ONAC129* were amplified, and the  
129 3×Flag or EGFP coding sequence was fused at the 3' end. The fused sequences were  
130 cloned into the binary vector pCAMBIA1301U (driven by a maize ubiquitin promoter).  
131 For tissue specific expression analysis, a 2000-bp fragment of the 5' upstream region  
132 of *ONAC127* and a 2043-bp fragment of the 5' upstream region of *ONAC129* were  
133 cloned into the binary vector pDX2181G (with GUS, β-glucuronidase). These  
134 recombinant constructs were introduced into rice Zhonghua11 (ZH11; *Oryza sativa* ssp.  
135 *japonica*) by *Agrobacterium tumefaciens* (EH105)-mediated transformation (Lin and  
136 Zhang, 2005). The plants were cultivated in the paddy fields of Huazhong Agricultural  
137 University, Wuhan, China, under natural long-day conditions (approximately 12–14 h  
138 light/10–12 h dark) during May to October 2018. The temperature data of the growing  
139 area during rice reproductive stage are shown in Supplementary Fig. S7. The  
140 temperature of 35°C was set as the heat damage temperature of rice ( $T_B$ ), and the heat  
141 damage accumulated temperature per hour ( $TH_i$ ) was calculated as  $TH_i =$   
142  $\begin{cases} T_i - T_B & T_i \geq T_B \\ 0 & T_i < T_B \end{cases}$  ( $T_i$  is the ambient temperature at  $i$  hour); heat damage hours  
143 during filling stage ( $H_s$ ) was calculated as  $H_s = \sum_{i=0}^n H_i$  ( $H_i = \begin{cases} 1 & T_i \geq T_B \\ 0 & T_i < T_B \end{cases}$ );  
144 and heat damage accumulated temperature during filling stage ( $T_s$ ) was calculated as  
145  $T_s = \sum_{i=0}^n TH_i$  using the method described by Chen *et al.* (Chen *et al.*, 2019). The  $T_s$   
146 during 0–7 DAP ( $T_{s7}$ ) and  $H_s$  during 0–7 DAP ( $H_{s7}$ ) were also calculated as the method  
147 above. Since two batches of rice plants were flowering in a large scale on about July  
148 20<sup>th</sup> and August 20<sup>th</sup>, we marked most of the flowering spikelets in all plants at the days  
149 around these two dates (including mutants, overexpression lines and ZH11(WT)), and  
150 the immature seeds used in the experiment were all from the spikelets marked in these  
151 days. Therefore, these two dates were set as the starting date for the calculation of the  
152 heat accumulation temperature. The phenotypes were detected in homozygous  $T_1$   
153 generation of transgenic plants. The primer sequences used in this study are listed in  
154 Supplementary Table S1 and would not be repeated hereafter.

155 *Histochemical GUS staining*

156 Immature seeds on 5 and 7 DAP from pONAC127::GUS and pONAC129::GUS  
157 transgenic plants were collected for GUS staining assay following the previously  
158 described method (Yang *et al.*, 2018).

159 *Microscopy analysis*

160 For semi-thin section microscopy analysis, immature seeds on 7 DAP were placed  
161 in 2.5% glutaraldehyde for fixation, vacuum infiltrated on ice for 30 min and incubated  
162 at 4°C for 24 h. The plastic embedding and sectioning were performed as previously  
163 described (Wang *et al.*, 2008a). The slides were stained with toluidine blue and detected  
164 by a BX53 microscope (Olympus).

165 *RNA in situ hybridization*

166 Immature seeds (1–10 DAP) from rice ZH11 were collected for paraffin embedding.  
167 Paraffin sectioning was performed according to a previous method (Xiong *et al.*, 2019).  
168 Gene-specific fragments of *ONAC127* and *ONAC129* were amplified by the primers  
169 used in RT-PCR and cloned into the pGM-T vector. The probes were synthesized using  
170 the DIG RNA labeling kit (SP6/T7) (Roche) according to the manufacturer's  
171 recommendations. RNA hybridization and immunologic detection of the hybridized  
172 probes were performed on sections as described previously (Kouchi and Hata, 1993).  
173 Slides were observed using a BX53 microscope (Olympus).

174 *Transient expression assays*

175 To investigate the subcellular localization of ONAC127 and ONAC129, the CDS  
176 of these genes was cloned into the pM999-35S vector, and the nuclear located gene  
177 *Ghd7* was used as a nuclear localization marker (Xue *et al.*, 2008). For the BiFC assay,  
178 the CDS of *ONAC127* and *ONAC129* was cloned into the vectors pVYNE and pVYCE  
179 (Waadt *et al.*, 2008), respectively. The plasmids were extracted and purified using the

180 Plasmid Midi Kit (QIAGEN) and then transformed into rice protoplasts according to  
181 the previously described procedure (Shen *et al.*, 2017a). The fluorescent signals were  
182 detected with a confocal laser scanning microscope (TCS SP8, Leica).

### 183 *RNA isolation and transcript analysis*

184 Total RNA was isolated using the TRIzol method (Invitrogen), and the first strand  
185 cDNA was synthesized using HiScript II Reverse Transcriptase (Vazyme). The real-  
186 time PCR was performed on QuantStudio 7 Flex Real-Time PCR System (Applied  
187 Biosystems), with the  $2^{-\Delta\Delta C_t}$  method for relative quantification (Livak and Schmittgen,  
188 2001). The significance of differences was estimated using Student's t-test. Relevant  
189 primers were designed according to qPrimerDB (<https://biodb.swu.edu.cn/qprimerdb>)  
190 (Lu *et al.*, 2018).

### 191 *Yeast assays*

192 For yeast two-hybrid assay, the CDS of *ONAC127* and *ONAC129* was cloned into  
193 the pGBKT7 and pGADT7 vector (Clontech). The fusion plasmids were then  
194 transformed into yeast strain AH109 or Y187. The pGBKT7-53 was co-transformed  
195 with pGADT7-T as a positive control. For yeast one-hybrid assay, DNA fragments of  
196 about 1000 bp corresponding to the promoters of the target genes were separately  
197 inserted into the pHisi-1 plasmid (Clontech). *ONAC127* and *ONAC129* were fused to  
198 GAL4 transcriptional activation domain (pGAD424). These constructs were then  
199 transformed into the yeast strain YM4271. Yeast two-hybrid assay and one-hybrid assay  
200 were performed following the manufacturer's instructions (Clontech).

### 201 *Chromatin immunoprecipitation (ChIP)*

202 *ONAC127* and *ONAC129* overexpression lines (fused with 3×FLAG) were used  
203 for ChIP-Seq analysis. The expression of the target proteins was verified by western  
204 blot using ANTI-FLAG M2 Monoclonal Antibody (Sigma-Aldrich). ChIP assay was



205 performed with ANTI-FLAG M2 Magnetic Beads (Sigma-Aldrich) with the previously  
206 described method (Xiong *et al.*, 2019). For each library, three independent replicated  
207 samples were prepared. The immunoprecipitated DNA and input DNA were subjected  
208 to sequencing on the HiSeq 2000 platform (Illumina) by the Novogene Corporation.  
209 The quality of the sequencing data is shown in Supplementary Dataset S3.

210 ChIP-Seq raw sequencing data were mapped to the rice reference genome (RGAP  
211 ver. 7.0, <http://rice.plantbiology.msu.edu>) (Kawahara *et al.*, 2013) using BWA (Li and  
212 Durbin, 2009). MACS2 (Zhang *et al.*, 2008) was used for peak calling and the peaks  
213 were identified as significantly enriched with corrected  $p$ -value  $< 0.05$  in the IP libraries  
214 compared with input DNA. Visual analysis was performed using IGV (Intergative  
215 Genomics Viewer, v2.3.26) (Robinson *et al.*, 2011). Motif enrichment analysis was  
216 performed by MEME (Machanick and Bailey, 2011) with default parameters.

217 To validate the specific target genes, the immunoprecipitated DNA and input DNA  
218 were applied for ChIP-qPCR analysis. The enrichment value was normalized to that of  
219 the input sample. The significance of differences was estimated using Student's t-test.

## 220 *RNA-Seq*

221 Total RNA was extracted from immature seeds at 7 DAP. For each library, three  
222 independent replicate RNA samples were prepared. The RNA samples were then  
223 sequenced on the HiSeq 2000 platform (Illumina) by the Novogene Corporation. The  
224 quality of the sequencing data is shown in Supplementary Dataset S3.

225 The raw reads were filtered to remove the adaptors and low-quality reads. Clean  
226 reads were then mapped to the reference genome of rice (RGAP v. 7.0) using HISAT2  
227 (v.2.0.5) (Kim *et al.*, 2015). The differentially expressed genes (DEGs) ( $|\text{Fold Change}|$   
228  $\geq 2$  and corrected  $p$ -value  $< 0.05$ ) were selected by DESeq2 software (Love *et al.*, 2014).  
229 GOseq (Young *et al.*, 2010) was used for GO enrichment analysis, and FDR was  
230 converted to  $-\log_{10}(\text{FDR})$  for display.

231 *In vitro* GST pull-down assay

232 The CDS of *ONAC127* and *ONAC129* was cloned into pET28a and pGEX-4-1  
233 vectors respectively for His-tagged *ONAC127* and GST-tagged *ONAC129* protein  
234 expression *in vitro*. The fusion plasmids were transformed into *Escherichia coli* BL21  
235 strain. The GST pull-down assay was performed according to the previous method  
236 (Xiong *et al.*, 2019). The protein was separated on a 10% SDS-PAGE gel and further  
237 analyzed by immunoblotting using anti-His and anti-GST antibody (Sigma-Aldrich).

238 *Dual luciferase transcriptional activity assay*

239 Full-length cDNAs of *ONAC127* and *ONAC129* were cloned to yeast GAL4  
240 binding domain vectors (GAL4BD) and “None” as effectors. The 35S-GAL4-fLUC and  
241 190-fLUC were used as reporters, and AtUbi::rLUC was used as an internal control.  
242 The constructed plasmids were purified and transformed into rice protoplasts with the  
243 procedure described above. Dual Luciferase Reporter Assay System (Promega) was  
244 used to measure the luciferase activity by Tecan Infinite M200 (Tecan).

245 *Agronomic trait analysis*

246 The harvested mature rice grains were air dried and stored at room temperature for  
247 at least 2 months before measuring. Only full grains were used for measuring the 1000-  
248 grain weight, which was calculated based on 100 grains. The seed set rate/composition  
249 was calculated based on the grains from 3–5 panicles (including the full, shrunken and  
250 blighted grains). All measurements of the positive transgenic plants were performed  
251 with three independent lines.

252 *Accession Numbers*

253 The sequence data in this study can be found in the RGAP database  
254 (<http://rice.plantbiology.msu.edu>) under the following accession numbers: *ONAC025*  
255 (*LOC\_Os11g31330*), *ONAC127* (*LOC\_Os11g31340*), *ONAC128* (*LOC\_Os11g31360*),

256 *ONAC129* (LOC\_Os11g31380), *OsMST6* (LOC\_Os07g37320), *OsSWEET4*  
257 (LOC\_Os02g19820), *OsEATB* (LOC\_Os09g28440), *OsMSR2* (LOC\_Os01g72530),  
258 *bHLH144* (LOC\_Os04g35010), *OsHCII* (LOC\_Os10g30850), *HSP101*  
259 (LOC\_Os05g44340), *OsSWEET11* (LOC\_Os08g42350), *OsSWEET15*  
260 (LOC\_Os02g30910), *OsZIP63* (LOC\_Os07g48820). The RNA-seq and ChIP-seq data  
261 are deposited in the NCBI Gene Expression Omnibus (Edgar *et al.*, 2002) with the  
262 accession number of GSE140167.

## 263 **Results**

264 *ONAC127* and *ONAC129* were specifically expressed in rice seeds

265 For a basic understanding of *ONAC025*, *ONAC127*, *ONAC128* and *ONAC129*, we  
266 firstly checked the expression data of these four genes in the microarray database CREP  
267 (<http://crep.ncpgr.cn>) (Wang *et al.*, 2010). The results showed that *ONAC025* had  
268 significantly higher expression levels in various tissues than other genes, while  
269 *ONAC128* had the lowest expression level. It is noteworthy that the expression level of  
270 *ONAC127* and *ONAC129* in the seed reached the maximum at 7 day after pollination  
271 (DAP), followed by gradual decreases.

272 To validate the spatial and temporal expression patterns and further explore the  
273 specific distribution of *ONAC127* and *ONAC129* expression in rice seeds, we  
274 mechanically isolated rice seeds at 5–14 DAP into starch endosperm, embryo and the  
275 mixture of pericarp and aleurone layer for qRT-PCR analysis according to a previously  
276 described method (Bai *et al.*, 2016). The gene specifically expressed in the aleurone  
277 layer *oleosin* and that specifically expressed in starch endosperm *SDBE* were used as  
278 markers (Ishimaru *et al.*, 2015) (Supplementary Fig. S1). The results showed that  
279 *ONAC127* and *ONAC129* were predominantly expressed in the pericarp or aleurone  
280 layer, while weakly expressed in starch endosperm, and the expression reached the  
281 maximum level at 5 DAP during the whole development process (Fig. 1A).

282 The mRNA *in situ* hybridization analysis on the immature seeds of ZH11 showed

283 that *ONAC127* and *ONAC129* were dominantly expressed in the pericarp, while their  
284 expression levels in the aleurone layer and starch endosperm were rather low (Fig. 1B).  
285 Histochemical GUS activity was also detected in the transgenic plants expressing  
286 pONAC127::GUS and pONAC129::GUS, and the results were almost identical to those  
287 of *in situ* hybridization analysis: *ONAC127* and *ONAC129* were predominantly  
288 expressed in the pericarp of seeds (Fig. 1C). Since 5 DAP is a key time point of seed  
289 development when the organogenesis is completed and the maturation stage just  
290 initiates (Agarwal *et al.*, 2011), *ONAC127* and *ONAC129* might be involved in some  
291 substance accumulation processes and play some vital roles in grain filling and  
292 maturation.

293 We then transiently transformed ONAC127 or ONAC129 protein with the fusion  
294 of green fluorescent protein (GFP) into rice protoplast to investigate the subcellular  
295 localization pattern of the two genes. 35S::GFP was used as a positive control and  
296 35S::Ghd7-CFP was used as a nuclear marker (Xue *et al.*, 2008). The fluorescent  
297 signals generated by ONAC127-GFP and ONAC129-GFP were distributed in the  
298 nucleus and cytoplasm just like the positive control (Fig. 1D). To further confirm the  
299 subcellular localization, transgenic plants expressing pUbi::ONAC127-GFP and  
300 pUbi::ONAC129-GFP were generated in Zhonghua11 (ZH11) background. The diverse  
301 cell types and large number of starch grains in seeds made it difficult to distinguish the  
302 protein subcellular localization in rice seeds. Hence, the subcellular localization  
303 patterns of ONAC127 and ONAC129 were validated by detecting the fluorescent  
304 signals from the roots of two-week-old rice seedlings. The results showed that  
305 ONAC127 and ONAC129 proteins were indeed localized in the nucleus and cytoplasm  
306 (Supplementary Fig. S2).

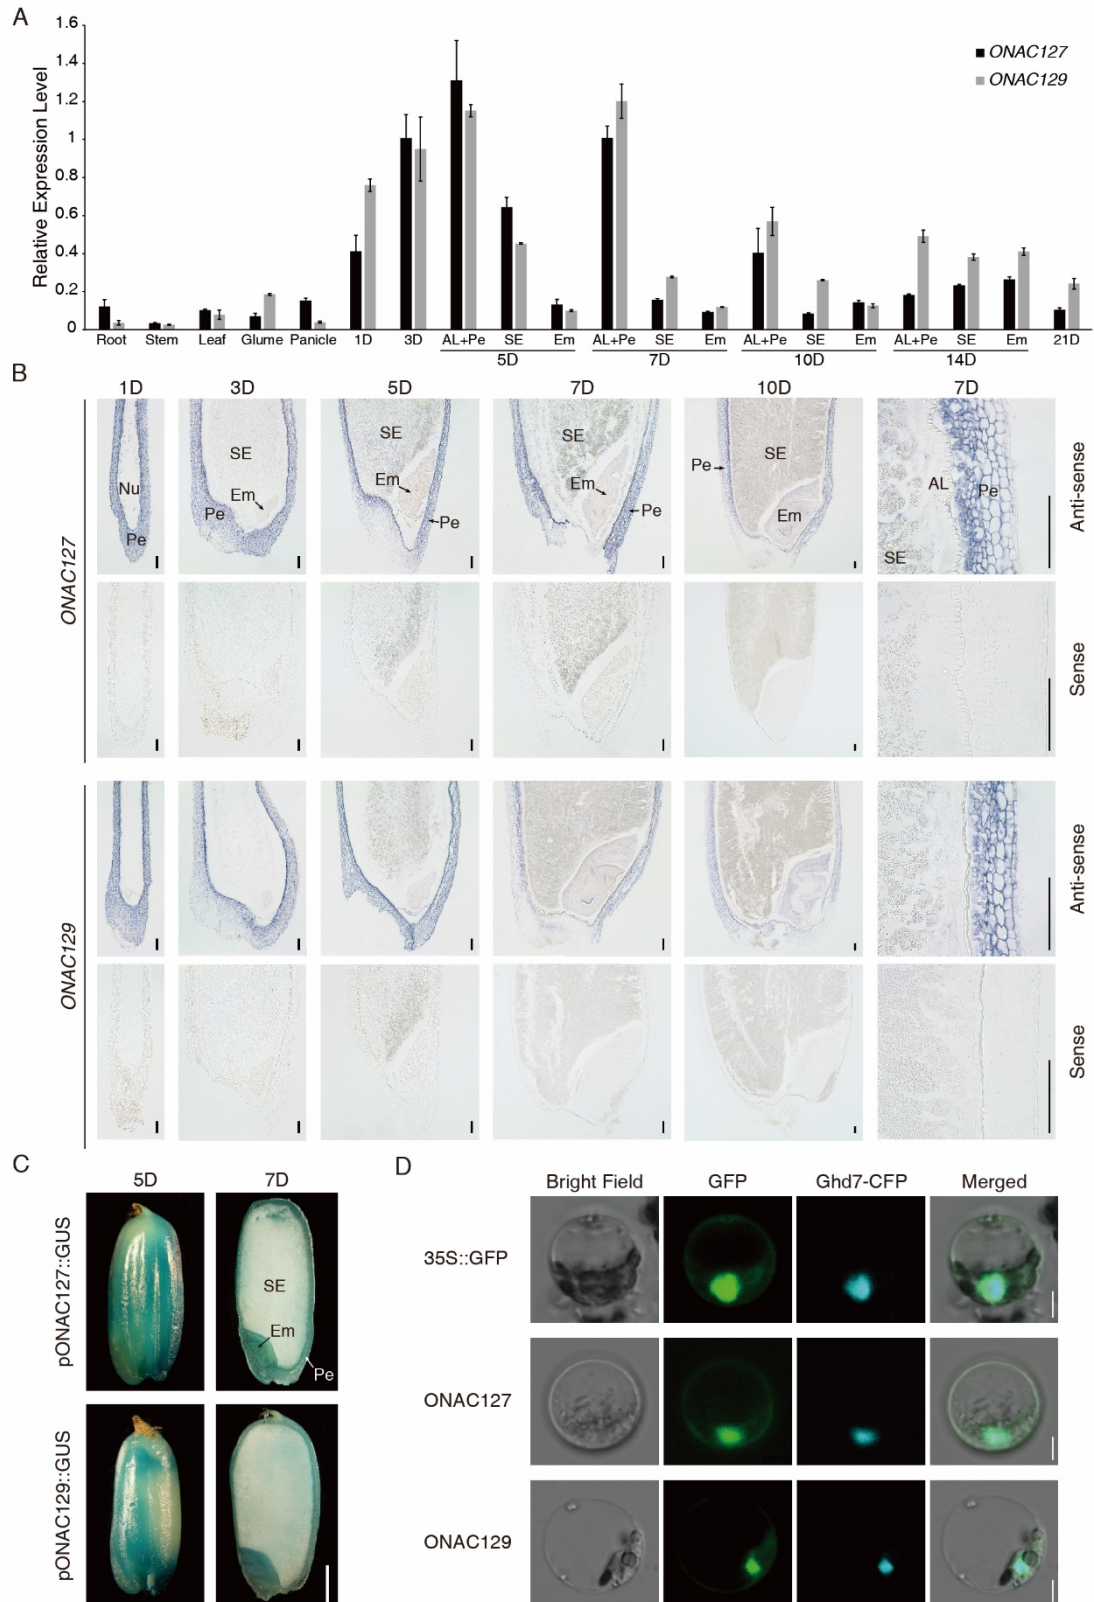

307

308 **Fig. 1. Spatial and temporal expression patterns of *ONAC127* and *ONAC129*.**

309 (A) qRT-PCR analysis of *ONAC127* and *ONAC129* in different tissues. AL, aleurone layer; Pe,

310 pericarp; SE, starchy endosperm; Em, embryo; 1-21D, caryopses collected during 1–21 DAP. The

311 values in each column are the mean of three technical replicates and the error bars indicate the  $\pm$ SD.  
312 Ubiquitin was used as the reference gene. (B) *In situ* hybridization of sectioned seeds collected at 1,  
313 3, 5, 7 and 10 DAP using anti-sense and sense probes. Nu, nucleus; Pe, pericarp; SE, starchy  
314 endosperm; Em, embryo; AL, aleurone layer. Scale bars = 50  $\mu$ m. (C) Histochemical GUS activity  
315 detection using pONAC127::GUS and pONAC129::GUS. Pe, pericarp; SE, starchy endosperm; Em,  
316 embryo. Scale bar = 1 mm. (D) Subcellular localization of *ONAC127* and *ONAC129* in rice  
317 protoplasts. 35S::Ghd7-CFP was used as a nuclear marker. Scale bars = 5  $\mu$ m.

### 318 *ONAC127 and ONAC129 formed a heterodimer*

319 It has been reported that the NAC TFs usually function as a dimer (Olsen *et al.*,  
320 2005). Thus, we investigated whether there is any interaction between *ONAC127* and  
321 *ONAC129*. The results indicated that *ONAC127* could interact with *ONAC129* in yeast  
322 (Fig. 2A). We also determined whether *ONAC127* and *ONAC129* could form  
323 homodimers, but the results showed that they could not interact with themselves in  
324 yeast. To confirm the interaction between *ONAC127* and *ONAC129*, *in vitro* GST pull-  
325 down assay was carried out. His-tagged *ONAC127* and GST-tagged *ONAC129* were  
326 expressed respectively and then incubated together. The protein mixture of GST and  
327 *ONAC127*-His was used as a negative control. After purification by Glutathione  
328 Agarose, *ONAC127*-His was detected in the sample containing *ONAC129*-GST  
329 instead of the control with His-tag antibody (Fig. 2B). *In vivo* bimolecular fluorescence  
330 complementation (BiFC) assay was also performed with rice protoplasts, with nuclear  
331 homodimer OsbZIP63 being chosen as the positive control (Walter *et al.*, 2004), and  
332 35S::Ghd7-CFP being used as the nuclear marker. Yellow fluorescence generated from  
333 the interaction between *ONAC127*-YFP<sup>N</sup> and *ONAC129*-YFP<sup>C</sup> was detected,  
334 confirming the formation of a heterodimer by *ONAC127* and *ONAC129* in the nucleus  
335 (Fig. 2C). Previous studies have shown that some NAC TFs were located in the  
336 cytoplasm or plasma membrane, but under some specific conditions they could be  
337 imported into the nucleus (Fang *et al.*, 2014). Based on the subcellular localization

338 patterns of ONAC127 and ONAC129 (Fig. 1D), we speculated that these two proteins  
339 might also exert their transcriptional regulation functions in this way.

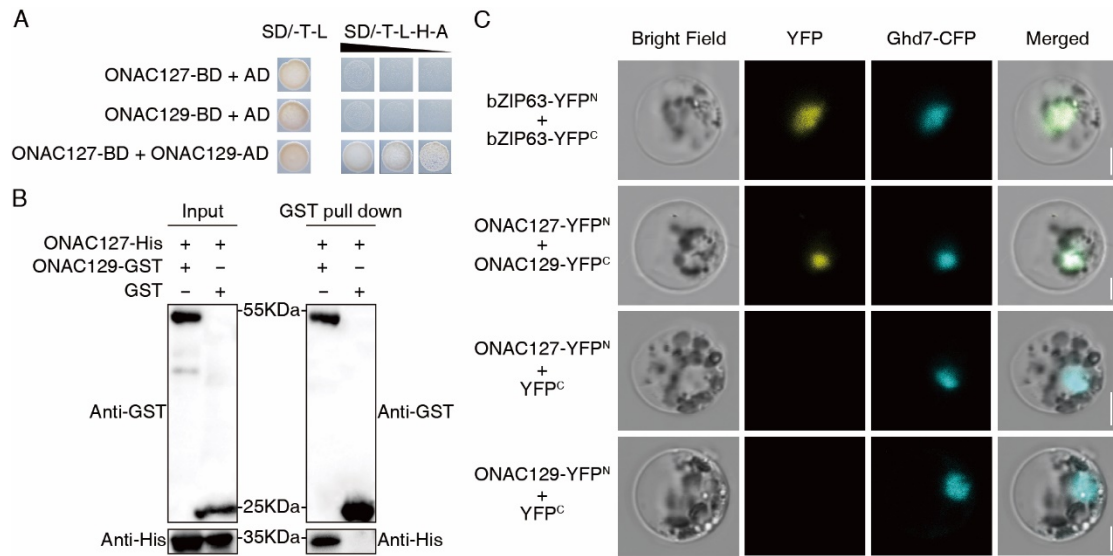

340

341 **Fig. 2. Interaction between ONAC127 and ONAC129.**

342 (A) Yeast two-hybrid assay. The full-length cDNA of ONAC127 and ONAC129 was both cloned  
343 into pGBKT7 (BD) and pGADT7 (AD). The transformants were grown on [SD/-Trp /-Leu] and  
344 [SD/-Trp/-Leu/-His/-Ade] plates with 10<sup>0</sup>, 10<sup>-1</sup> and 10<sup>-2</sup> fold dilution. (B) The pull-down assays  
345 showing that there is a direct interaction between ONAC127-His and ONAC129-GST *in vitro*. (C)  
346 The BiFC assays of ONAC127 and ONAC129. ONAC127-YFP<sup>N</sup> and ONAC129-YFP<sup>C</sup> interact to  
347 form a functional YFP in rice protoplasts. 35S::Ghd7-CFP was used as a nuclear marker. Scale bars  
348 = 5 μm.

349 *ONAC127 and ONAC129 played key roles in starch accumulation during rice grain*  
350 *filling*

351 *ONAC127* or *ONAC129* knockout mutants (*onac127* and *onac129*) were obtained  
352 in ZH11 background by CRISPR/Cas9 genome editing system (Ma *et al.*, 2015).  
353 Considering that these two proteins could form a heterodimer, double knockout mutants  
354 (*onac127;129*) were also obtained. The sgRNA target sites were designed at the exons  
355 of *ONAC127* and *ONAC129* by using the web-based tool CRISPR-P (Liu *et al.*, 2017).  
356 There were two target sites of each target gene in corresponding mutants, which were  
357 expected to generate different mutations in the coding region of corresponding target

358 genes (Fig. 3A). The seeds of three T<sub>0</sub> homozygous plants of each mutant were selected  
359 for the generation of independent T<sub>1</sub> transgenic lines. The sequencing data of the  
360 transgenic lines were decoded by the method described in a previous study (Liu *et al.*,  
361 2015), and the genotypes of the homozygous lines are shown in Supplementary Fig. S3.  
362 On the other hand, the overexpression lines pUbi::ONAC127-FLAG and  
363 pUbi::ONAC129-FLAG (OX127 and OX129) were also generated (Fig. 3B). The  
364 relative expression levels of *ONAC127* and *ONAC129* in the overexpression lines were  
365 analyzed by qRT-PCR (Supplementary Fig. S4).

366 During the rice reproductive stage, it was found that the development of some seeds  
367 in both the overexpression lines and mutants of *ONAC127* and *ONAC129* was arrested  
368 from 5 DAP to 7 DAP (Supplementary Fig. S5), resulting in some shrunken and  
369 incompletely filled grains after maturation (Fig. 3C, D). As mentioned before, the  
370 expression level of *ONAC127* and *ONAC129* was very high during 5–7 DAP (Fig. 1A),  
371 and their functions seemed to be closely related to grain filling, especially at the early  
372 stage of maturation. Since a contradictory phenotype was observed, we determined the  
373 expression levels of *ONAC127* and *ONAC129* in the transgenic lines. As a result,  
374 *ONAC127* and *ONAC129* were up-regulated in the overexpression lines and down-  
375 regulated in the mutants (Supplementary Fig. S6). It can be speculated that *ONAC127*  
376 and *ONAC129* may regulate several different pathways to contribute to rice grain  
377 filling at the same time. The expression of *ONAC127* and *ONAC129* may need to be  
378 maintained at a steady and balanced level, and any fluctuation in their expression may  
379 interfere with the normal function of different pathways to cause defective grain filling  
380 in rice.

381 To further explore the reason for the phenotype of shrunken grains, histological  
382 analysis with resin embedded sections was carried out with 7 DAP seeds of incomplete  
383 filling. In ZH11, starch is transiently stored in the pericarp during the early stage, and  
384 starch degradation in the pericarp is correlated with starch accumulation in the  
385 endosperm (Wu *et al.*, 2016). As expected, neatly and densely arranged starch grains



386 were found in the endosperm of ZH11 seeds, while hardly observed in the pericarp (Fig.  
 387 3E). In contrast, many starch grains were accumulated in the pericarp of the mutants  
 388 and the overexpression lines, particularly in the double mutant *onac127;129*, in which  
 389 few starch grains could be found in the endosperm (Fig. 3E). These findings suggested  
 390 that *ONAC127* and *ONAC129* might play critical roles in the translocation and  
 391 mobilization of starch to developing endosperm.

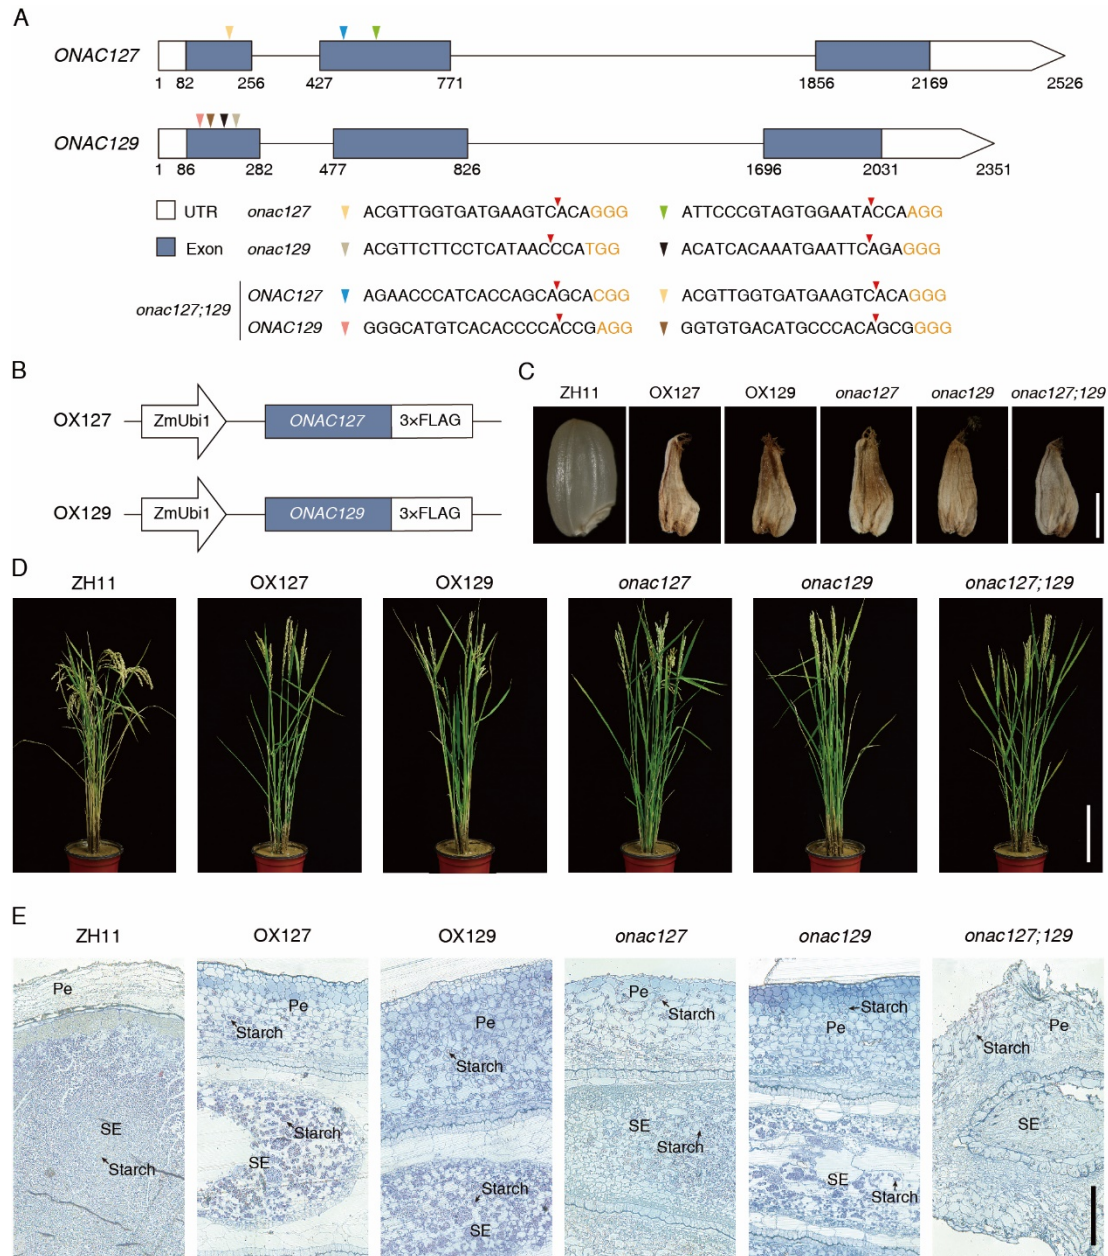

392 **Fig. 3. Construction of CRISPR mutants and overexpression plants and their phenotypes.**  
 393 (A) Schematic diagram of the sgRNA target sites in genomic region of *ONAC127* and *ONAC129*.  
 394 The target sequences of *onac127*, *onac129* and *onac127;129* are listed under the diagram and  
 395

396 marked as a colorful triangle. The Cas9 splice sites are marked as red triangle and the protospacer-  
397 adjacent motifs are shown in orange. (B) Schematic diagram of the construction of OX127 and  
398 OX129. (C) Phenotypes of grains of the overexpression lines and mutants of *ONAC127* and  
399 *ONAC129*. Scale bars = 2 mm. (D) Phenotypes of panicles at maturation stage. The panicles of  
400 transgenic plants are almost upright while those of ZH11 are bent due to grain filling. Scale bars =  
401 20 cm. (E) Accumulation of starch in the seed pericarp of overexpression lines and mutants  
402 relative to ZH11. Cross sections of seeds stained with toluidine blue at 7DAP. Pe, pericarp; SE,  
403 starchy endosperm. Scale bar = 40  $\mu$ m.

#### 404 *ONAC127 and ONAC129 were involved in heat stress response*

405 In the measurement of agronomic traits, the transgenic lines of *ONAC127* and  
406 *ONAC129* showed significant reduction in both seed setting rate (percentage of fully  
407 filled grains per panicle after harvest) and 1000-grain weight (only fully filled grains  
408 were weighed) compared with ZH11 (Table 1). The transgenic lines showed an obvious  
409 increase in the percentage of shrunken grains per panicle while no significant change  
410 in the proportion of blighted grains per panicle (glumes with no seed) (Table 1), proving  
411 that the reduction of seed setting rate and grain yield could be mainly ascribed to the  
412 increase in shrunken grains.

413 Notably, the transgenic plants suffered from severe heat stress at the grain filling  
414 stage in the summer of 2018 (Supplementary Fig. S7). Previous studies have shown  
415 that the ambient temperature higher than 35°C at flowering and grain filling stages has  
416 a serious impact on the yield (Hakata *et al.*, 2017). Therefore, we set 35°C as the heat  
417 damage temperature of rice ( $T_B$ ), and calculated the heat damage accumulated  
418 temperature per hour ( $TH_i$ ), heat damage accumulated temperature during filling stage  
419 ( $T_s$ ) and heat damage hours during filling stage ( $H_s$ ) as previously described (Chen *et*  
420 *al.*, 2019). Given that *ONAC127* and *ONAC129* function at the early grain filling stage,  
421 we also calculated the heat damage accumulated temperature during 0–7 DAP ( $T_{S7}$ ) and  
422 heat damage hours during 0–7 DAP ( $H_{S7}$ ). It is worth noting that two batches of rice

423 were cultivated in the summer of 2018, and all the rice plants in the same batch were  
424 sown on the same day. The first batch of plants flowered on about July 20<sup>th</sup> while the  
425 second batch flowered on about August 20<sup>th</sup>. It is obvious that the Ts and Hs of the first  
426 batch were much higher than those of the second batch, especially at the early  
427 development stage of seeds (Supplementary Fig. S7). Therefore, the plants cultivated  
428 in the first batch were defined as suffering from heat stress, while those cultivated in  
429 the second batch were defined as growing under normal conditions with little or no heat  
430 stress. It was found that heat stress caused sharp increases of shrunken grains compared  
431 with normal conditions, and such increase was more dramatic in *onac127;129* than in  
432 other transgenic lines, which led to a significant decrease in the seed setting rate (Table  
433 1). Meanwhile, the expression level of *ONAC127* and *ONAC129* was drastically  
434 increased under heat stress (Supplementary Fig. S8), suggesting that these two genes  
435 might be involved in heat stress response at the grain filling stage of rice.

436

437

**Table 1. Agronomic trait analysis of wild type (ZH11) and transgenic lines of ONAC127/ONAC129.**

|                  | ZH11 (WT)                      | OX127          | OX129             | onac127           | onac129           | onac127:129       |
|------------------|--------------------------------|----------------|-------------------|-------------------|-------------------|-------------------|
| Heat stress      | Blighted Grain (%)             | 28.715 ± 1.542 | 26.192 ± 1.448    | 34.331 ± 2.397 *  | 30.316 ± 2.134    | 36.595 ± 1.781 *  |
|                  | Full Grain / Seed Set Rate (%) | 67.304 ± 1.594 | 44.469 ± 1.667 ** | 31.196 ± 0.450 ** | 39.284 ± 1.314 ** | 29.936 ± 2.293 ** |
|                  | Shrunken Grain (%)             | 3.981 ± 0.175  | 29.338 ± 1.861 ** | 34.473 ± 2.494 ** | 30.401 ± 3.205 ** | 33.469 ± 3.241 ** |
|                  | 1,000 Grains Weight            | 25.780 ± 0.083 | 24.669 ± 0.260 ** | 25.238 ± 0.255 *  | 24.268 ± 0.744 *  | 24.967 ± 0.614    |
| Normal Condition | Blighted Grain (%)             | 11.601 ± 0.983 | 14.394 ± 1.048    | 14.329 ± 1.308    | 12.616 ± 2.180    | 14.147 ± 2.083    |
|                  | Full Grain (%)                 | 84.454 ± 0.837 | 70.447 ± 3.635 ** | 66.011 ± 1.570 ** | 68.411 ± 4.148 ** | 71.742 ± 1.375 ** |
|                  | Shrunken Grain (%)             | 3.945 ± 0.289  | 15.159 ± 2.604 ** | 19.660 ± 0.610 ** | 18.973 ± 1.974 ** | 14.112 ± 0.779 ** |
|                  | 1,000-grain-weight             | 25.679 ± 0.122 | 24.873 ± 0.096 ** | 25.223 ± 0.405    | 24.630 ± 0.359 *  | 25.004 ± 0.293 *  |

439 Blighted grain, the ratio of blighted grains to all spikelets on a panicle. Full grain/seed set rate, the ratio of fully filled grains to all spikelets on a panicle. Shrunken  
440 grain, the ratio of incompletely filled grains to all spikelets on a panicle. 1,000-grain-weight was calculated based on 100 grains and only the fully filled grains were  
441 counted. All data are meant ( $\pm$ SD) from three independent lines, each of which are meant from three biological replicates. Significant differences between ZH11 and  
442 the transgenic lines were determined using Student's t-test (\*  $P < 0.05$ , \*\*  $P < 0.01$ ).

444 *ONAC129 negatively regulated ONAC127 transcriptional activity*

445 To further understand the relationship between *ONAC127* and *ONAC129*, it was  
446 necessary to determine the transcriptional activity of these two genes *in vivo*. Therefore,  
447 a dual luciferase assay was performed in rice protoplasts. *ONAC127* and *ONAC129*  
448 were respectively fused with the yeast GAL4 binding domain (GAL4BD) as effectors,  
449 which were then co-transformed into rice protoplasts with a firefly luciferase reporter  
450 gene driven by a CaMV35S promoter (35S-GAL4-fLUC; Fig. 4A). A significant  
451 increase was detected in the transcriptional activation activity of *ONAC127* and  
452 *ONAC129*, while the transcriptional activity of *ONAC127* was significantly suppressed  
453 when *ONAC129* was co-transformed into rice protoplasts (Fig. 4B). These results  
454 suggested that *ONAC129* might negatively regulate the transcriptional activity of  
455 *ONAC127*. We then attempted to determine whether *ONAC129* and *ONAC127*  
456 regulate the expression of each other. The results showed that there were no significant  
457 fluctuations in the expression of *ONAC127* in *ONAC129* transgenic lines and vice versa  
458 (Supplementary Fig. S6).

459 It is known that several NAC TFs contain both the transcriptional activation  
460 domain and NAC repression domain (NARD), which may determine the downstream  
461 events (Hao *et al.*, 2010). Hence, BLAST analysis was performed to compare the  
462 protein sequences of *ONAC127* and *ONAC129*, and NARD-like sequences were found  
463 in the subdomain D of the NAC domain in both genes (Fig. 4C), suggesting that  
464 *ONAC127* and *ONAC129* might be bifunctional TFs that could activate or repress  
465 downstream genes in different situations.

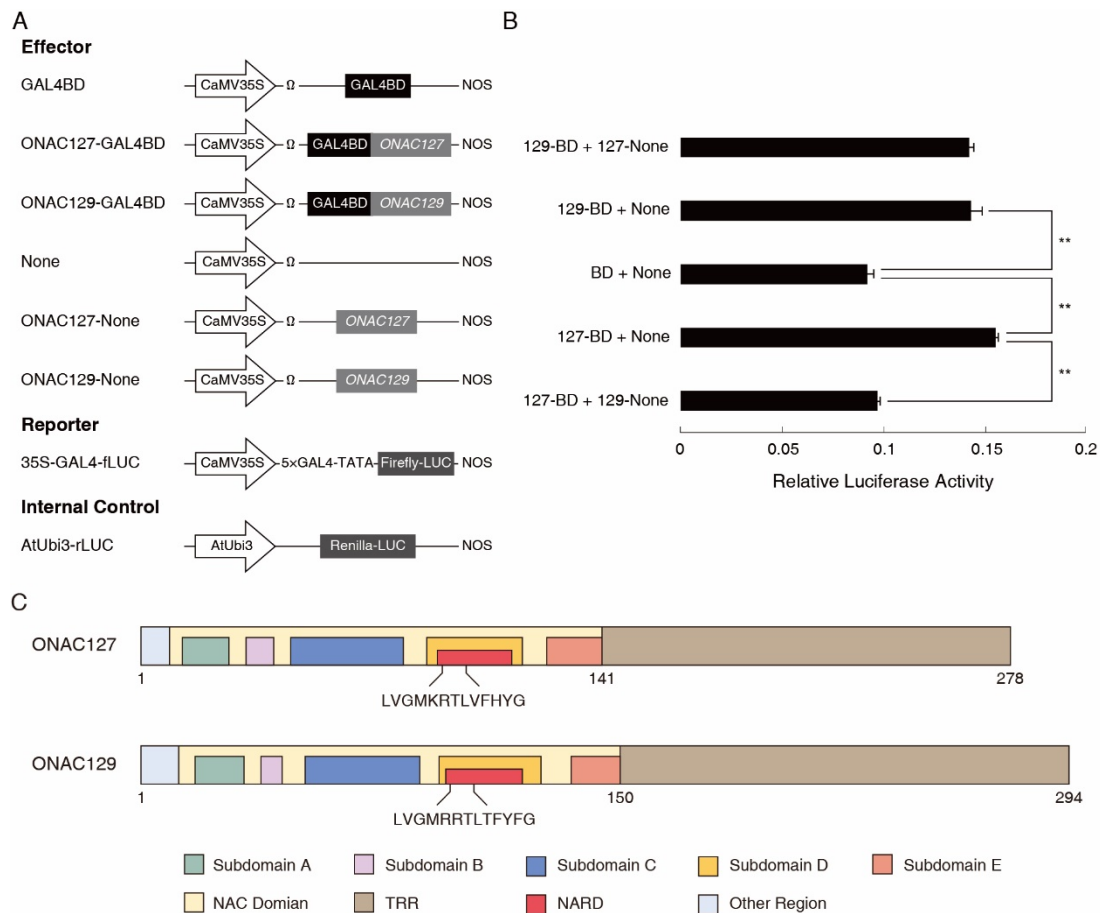

**Fig. 4. Negative regulation of ONAC129 on ONAC127 transcriptional activity.**

(A) Scheme of the constructs used in the rice protoplast cotransfection assay. (B) Data of Dual-LUC assay. The reporter and internal control were co-transformed with each experimental group. The fLUC/rLUC ratio represents the relative activity of CaMV35S promoter. The values in each column are the mean ( $\pm$ SD) of three replicates. Significant differences were determined using Student's t-test (\*\*  $P < 0.01$ ). (C) Schematic diagram of the domains of ONAC127 and ONAC129. The color legends indicating the domains shown at the bottom of the figure.

*ONAC127 and ONAC129 regulated the transcription of genes related to sugar transportation and abiotic stimuli*

RNA-Seq analysis can help to identify DEGs. RNA-seq libraries were generated with 7-DAP seeds of the overexpression lines and mutants of *ONAC127* and *ONAC129* under heat stress and normal conditions. Compared with ZH11 (ZH11H), a total of 7056, 6485, 5765, and 1608 DEGs were identified in *onac127* (*onac127H*), *onac129* (*onac129H*), OX127 (OX127H), and OX129 (OX129H) respectively under heat stress; compared with ZH11 (ZH11N), a total of 15334, 13284, 1776, and 2041 DEGs were identified in *onac127* (*onac127N*), *onac129* (*onac129N*), OX127 (OX127N), and

483 OX129 (OX129N) respectively under normal conditions (Fig. 5A, B; Supplementary  
484 Dataset S1). Gene Ontology (GO) enrichment analysis was performed to examine the  
485 biological roles of these DEGs in seed development. As a result, the significantly  
486 enriched GO terms were mainly associated with stimulus response, transcriptional  
487 activity regulation, signal transduction, cell wall construction and substance transport  
488 (Fig. 5C).

489 Subsequently, the genes directly bound by ONAC127 and ONAC129 in seeds were  
490 identified using Chromatin Immunoprecipitation Sequencing assays (ChIP-seq). The  
491 ChIP assays were performed using the anti-FLAG antibody with 7-DAP seeds of  
492 OX127 (OX127H) and OX129 (OX129H) under heat stress, and OX127 (OX127N)  
493 and OX129 (OX129N) under normal conditions. The expression of the ONAC127-  
494 FLAG and ONAC129-FLAG fusion proteins was verified by western blot analysis to  
495 validate the effectiveness of the FLAG tags (Supplementary Fig. S9). After sequencing,  
496 185, 6125, 220 and 455 peaks were finally obtained respectively in OX127H, OX127N,  
497 OX129H and OX129N (Supplementary Dataset S2), and 54, 5092, 82 and 212 putative  
498 genes directly bound by ONAC127 and ONAC129 were identified in OX127H,  
499 OX127N, OX129H and OX129N respectively according to the peaks (Fig. 5D). Then,  
500 the binding motifs of ONAC127 and ONAC129 were identified using MEME  
501 (Machanick and Bailey, 2011), and the results showed that the significantly enriched  
502 motif was 'CT(C)TTCT(C)TT' (Fig. 5E, F), which was in line with 'TT(A/C/G)CTT',  
503 the specific motif of transmembrane NAC TFs *NTL6* and *NTL8* (Lindemose *et al.*,  
504 2014). Both the two genes are associated with stimulus response, implying that  
505 *ONAC127* and *ONAC129* are probably involved in stress response. Notably, the motif  
506 'CT(C)TTCT(C)TT' was only found to be significantly enriched in OX127H and  
507 OX129H, while there was no significantly enriched motif in OX127N and OX129N,  
508 implying that the target genes of ONAC127 and ONAC129 might be more specific  
509 under heat stress.

510 To further explore the target genes of ONAC127 and ONAC129, the genes  
511 consistently bound by ONAC127/129 or simultaneously bound by these two proteins  
512 under heat stress or normal conditions were defined as the genes preferably bound by  
513 ONAC127/129 (Fig. 5D, red trapezoid). Based on the data of RNA-Seq analysis and  
514 phenotype of transgenic lines of ONAC127 and ONAC129, eight genes associated with  
515 sugar transport or abiotic stress response were selected from the 136 preferably bound  
516 genes as the potential target genes (PTGs) of ONAC127 and ONAC129 for further

517 analysis.

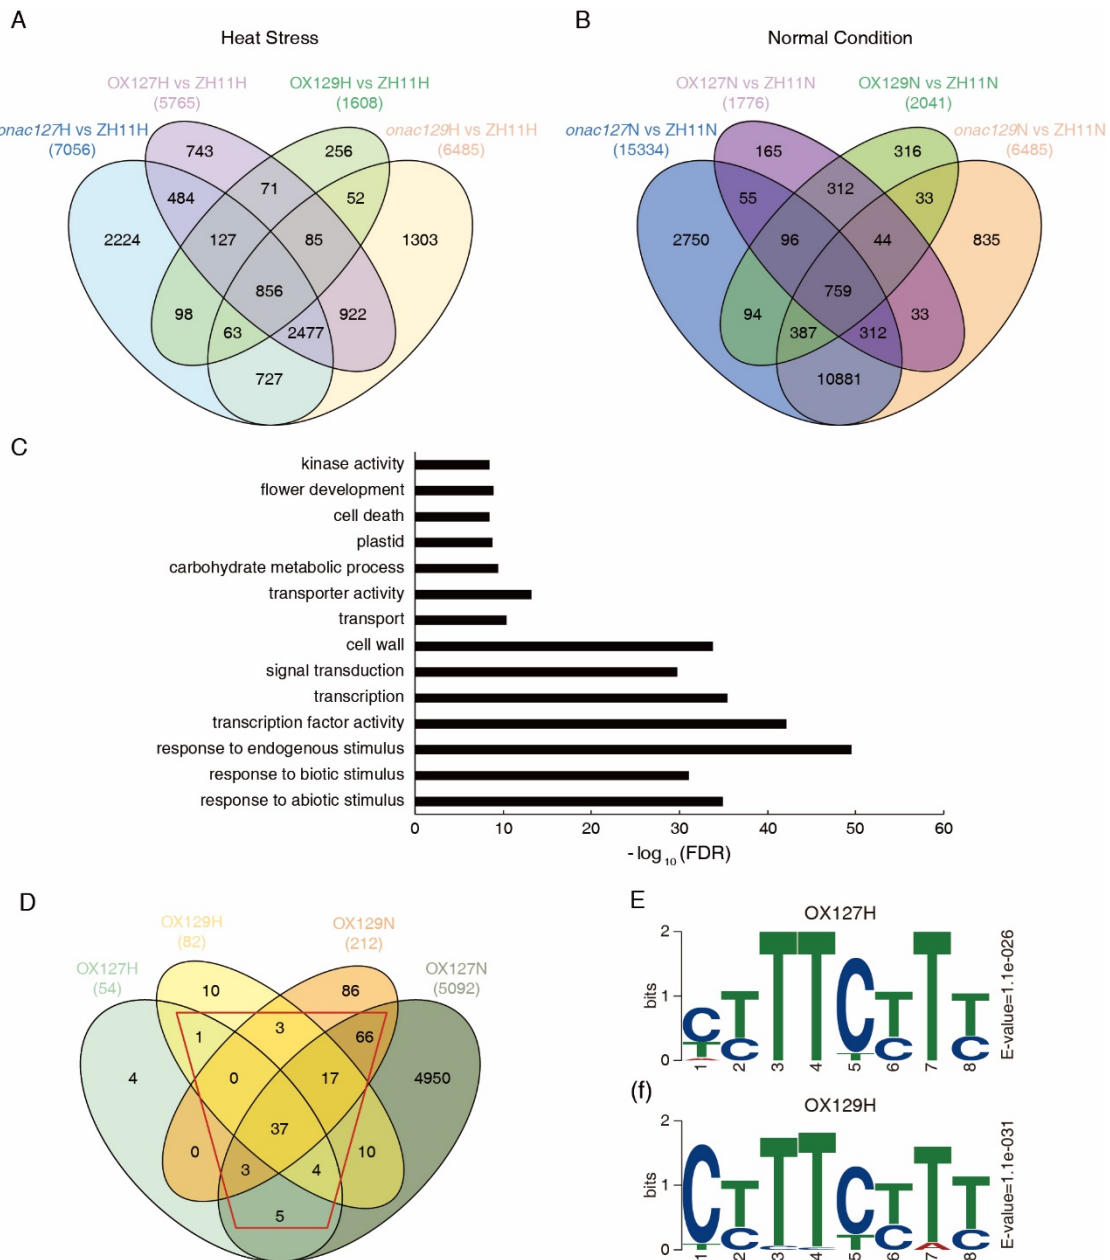

518

519 **Fig. 5. Data analysis of RNA-Seq and ChIP-Seq.**

520 (A) and (B): Venn diagram showing the number of genes regulated by *ONAC127* and *ONAC129*  
 521 based on the RNA-seq analysis. Differentially expressed genes are defined as  $|\text{Fold Change}| \geq 2$  and  
 522  $p\text{-value} < 0.05$ .  $p$ -values were calculated using the Fisher's exact test. (C) A selection of enriched  
 523 gene ontology (GO) terms of the differentially expressed genes. GO terms with  $\text{FDR} < 0.05$  were  
 524 kept. The length of the bars represents the negative logarithm (base 10) of FDR. (D) Venn diagram  
 525 showing the number of the direct target genes of *ONAC127* and *ONAC129*. The red trapezoid  
 526 indicates the preferably bound genes of *ONAC127* and *ONAC129*. (E) and (F): Motif analysis of  
 527 *ONAC127* and *ONAC129* binding peaks. The E-value is the enrichment  $P$ -value multiplied by the  
 528 number of candidate motifs tested.



529 *ONAC127 and ONAC129 played pivotal roles in grain filling through directly*  
530 *regulating key factors in substance accumulation and stress response*

531 Yeast one-hybrid assay was performed to validate the interactions between  
532 ONAC127/129 and the promoters of their PTGs. The results demonstrated that  
533 ONAC127 and ONAC129 could directly bind to the promoter sequences of *OsEATB*,  
534 *OsHCII*, *OsMSR2*, *OsSWEET4*, *bHLH144* and *OsMST6* in yeast (Fig. 6A). Dual-LUC  
535 assay in rice protoplasts was performed to determine whether ONAC127 and  
536 ONAC129 directly affect the transcription of these genes. ONAC127 and ONAC129  
537 were co-transformed into rice protoplasts with a firefly luciferase reporter gene driven  
538 by target gene promoters (Fig. 6B). It turned out that ONAC127 activated *OsMSR2* and  
539 *OsMST6* promoters significantly, and both ONAC127 and ONAC129 strongly  
540 repressed the *OsEATB* and *OsSWEET4* promoters *in vivo*. It is noteworthy that  
541 ONAC129 could suppress the transcriptional activation activity of ONAC127 on the  
542 promoters of *OsMSR2* and *OsMST6*, while could not regulate the transcription of  
543 *OsMSR2* and *OsMST6* (Fig. 6C).

544 To test whether the endogenous ONAC127 and ONAC129 can specifically bind  
545 their target genes, ChIP-qPCR was performed using the same rice materials of ChIP-  
546 Seq. The results indicated that ONAC127 and ONAC129 could bind to the promoters  
547 of *OsEATB*, *OsMSR2*, *OsSWEET4* and *OsMST6* under heat stress and normal  
548 conditions (Fig. 6D, E, F, G). The qRT-PCR for these genes was also performed in 7-  
549 DAP seeds of transgenic lines. The results revealed that the expression of *OsEATB* and  
550 *OsSWEET4* was significantly up-regulated in the mutants while generally down-  
551 regulated in the overexpression lines. The expression of both *OsMSR2* and *OsMST6*  
552 was up-regulated in *onac129* and down-regulated in *onac127* (Supplementary Fig. S10).  
553 These results indicated that *OsEATB*, *OsMSR2*, *OsSWEET4* and *OsMST6* are the direct  
554 targets of ONAC127 and ONAC129 in rice during grain filling.

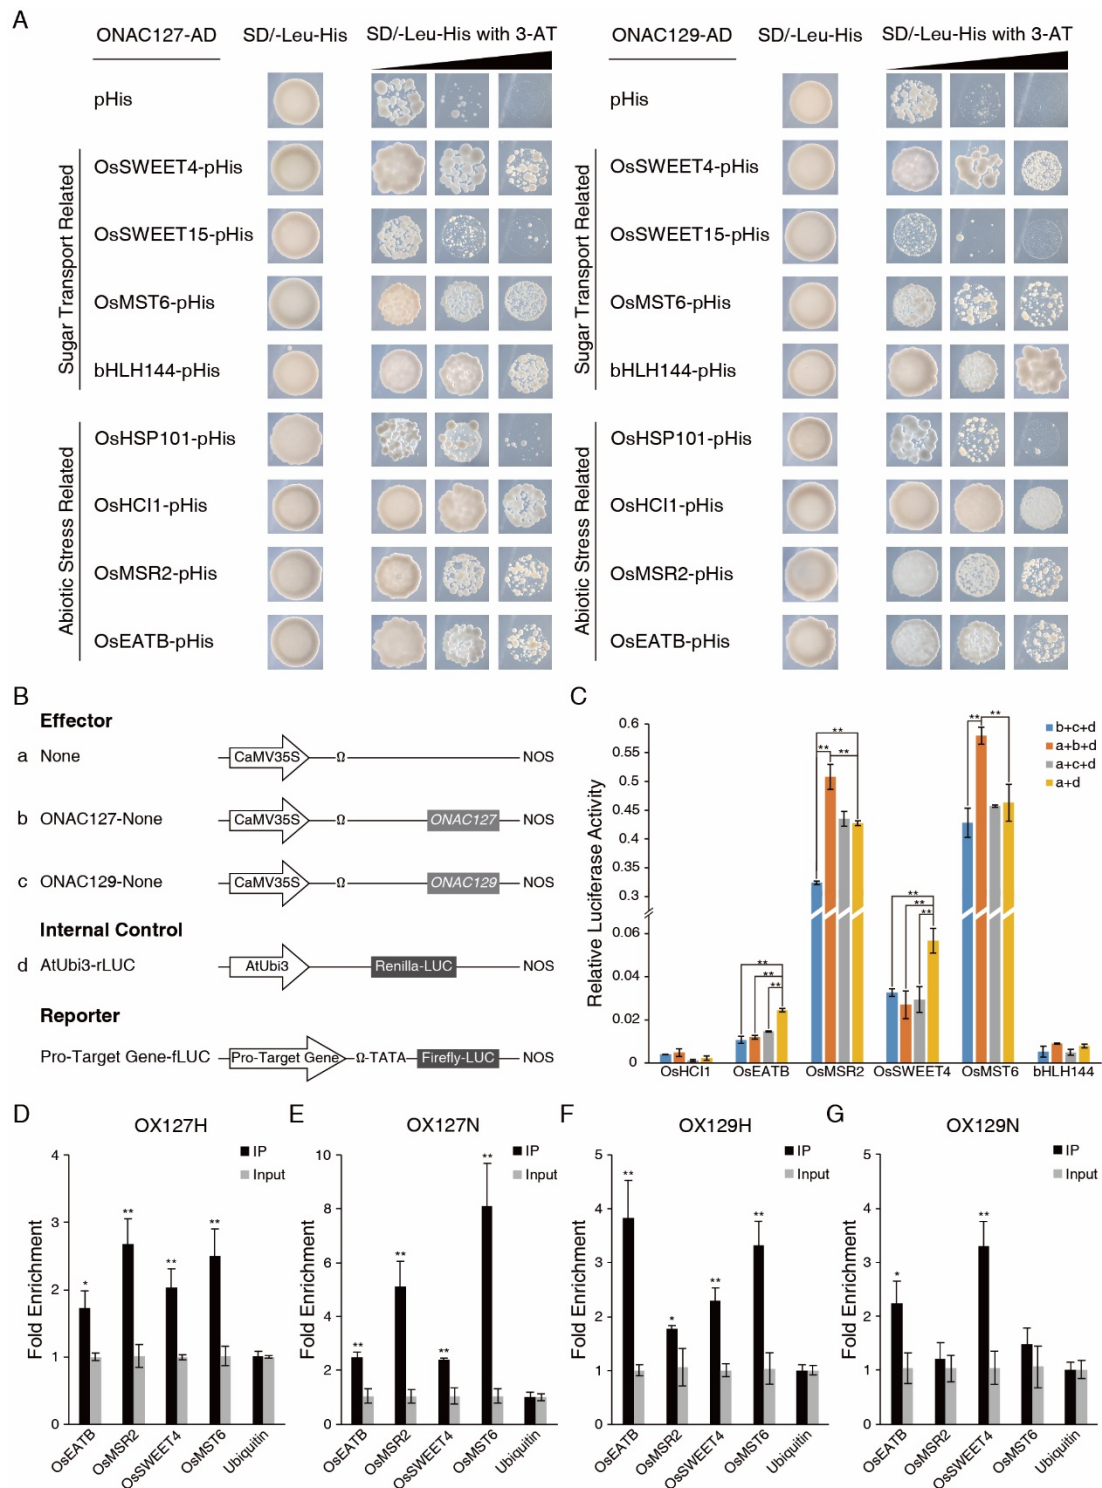

555

556

**Fig. 6. Identification and validation of the direct target genes of ONAC127 and ONAC129 in**

557

**rice.** (A) Interaction between ONAC127/129 and the promoters of PTGs as determined by yeast

558

one-hybrid analysis. The transformants were grown on [SD/-Leu /-His] plates with 3-AT at

559

concentrations of 50 mM, 100 mM and 150 mM, respectively. (B) Scheme of the constructs used

560

in the rice protoplast cotransfection assay. (C) Data of Dual-LUC assay. The fLUC/rLUC ratio

561

represents the relative activity of target gene promoters. (D-G) ChIP-qPCR verification of

562

ONAC127 and ONAC129 binding regions. The values in each column are the mean ( $\pm$ SD) of

563 three replicates. Significant differences were determined using Student's t-test (\*  $P < 0.05$ ; \*\*  
564  $P < 0.01$ ).

## 565 Discussion

566 In this study, two rice seed-specific NAC TFs *ONAC127* and *ONAC129* were  
567 identified, which can form a heterodimer and are predominantly expressed at the early  
568 and middle stage of rice seed development (Fig. 1, 2). Some grains of the transgenic  
569 plants were obviously unfilled (Fig. 3C, D, E; Supplementary Fig. S5), and there was a  
570 higher proportion of shrunken grains under natural heat stress (Table 1). Protein-DNA  
571 binding assays revealed that *ONAC127* and *ONAC129* may directly regulate the  
572 expression of the sugar transporters *OsMST6* and *OsSWEET4*. Both genes are involved  
573 in the transport of photosynthate from dorsal vascular bundles to endosperm during rice  
574 grain filling (Wang *et al.*, 2008b, Sosso *et al.*, 2015). *ONAC127* and *ONAC129* also  
575 bind to the promoters of *OsMSR2* and *OsEATB* directly (Fig. 6), which participate in  
576 abiotic stress response by responding to calcium ion ( $\text{Ca}^{2+}$ ) or plant hormones (Qi *et al.*,  
577 2011, Xu *et al.*, 2011). These findings suggest that *ONAC127* and *ONAC129* may be  
578 involved in multiple pathways, and therefore interfere with the abiotic stress response  
579 and grain filling process at rice reproductive stage.

580 *ONAC127* and *ONAC129* are involved in the apoplasmic transport of photosynthates  
581 as a balancer

582 At the early stage of seed development, some of the photosynthates from the dorsal  
583 vascular bundles are transported to the endosperm through the apoplasmic space formed  
584 by degenerative nucellar cell wall, and other photosynthates are used to synthesize  
585 starch grains in mesocarp cells (Hoshikawa, 1984). Starch accumulation in the pericarp  
586 will reach the maximum level at 5 DAP. After that, the starch in mesocarp cells is  
587 disintegrated and the nutrients are transported to the endosperm with the continuous  
588 filling of the endosperm cells. The inclusions of the pericarp cells will gradually  
589 disappear, and the cells will eventually dehydrate and die, only leaving cuticularized  
590 cell wall remnants (Wu *et al.*, 2016).

591 Due to the abnormal expression of *ONAC127* and *ONAC129*, there may be no  
592 sufficient photosynthate to fill the endosperm cells in abnormal grains owing to the  
593 functional defect of the apoplasmic transport pathway. The starch grains formed by

594 photosynthates accumulated in the pericarp are not disintegrated, which hinders the  
595 proliferation and filling of the endosperm cells by starch and eventually leads to  
596 incompletely filled and shrunken grains (Fig. 3C, E).

597 It is noteworthy that the target transporters *OsSWEET4* and *OsMST6* are  
598 predominantly expressed at the early stage of seed development, and may act  
599 downstream of the cell wall invertase *OsCIN2* to import hexose into the aleurone layer  
600 through the apoplasmic space (Wang *et al.*, 2008b, Sosso *et al.*, 2015, Yang *et al.*, 2018).  
601 As mentioned above, *ONAC127* and *ONAC129* directly suppress the expression of  
602 *OsSWEET4* (Fig. 6C; Supplementary Fig. S10); besides, *ossweet4-1*, the mutant of  
603 *OsSWEET4*, showed a distinct phenotype of shrunken grains, which is similar to the  
604 abnormal grains in the transgenic lines of *ONAC127* and *ONAC129* (Sosso *et al.*, 2015).  
605 These facts confirm our hypothesis that *ONAC127* and *ONAC129* are involved in the  
606 apoplasmic transport pathways by regulating the expression of transporters.

607 Moreover, the shrunken grains in the mutants and overexpression lines of  
608 *ONAC127* and *ONAC129* are also similar to the incompletely filled grains of the double  
609 mutant *ossweet11;15*, in which two apoplasmic transporters *OsSWEET11* and  
610 *OsSWEET15* were dysfunctional (Yang *et al.*, 2018). Since *OsSWEET15* has been  
611 excluded from the direct target genes by yeast one-hybrid assays (Fig. 6A), we  
612 determined the expression of *OsSWEET11* and *OsSWEET15* in the transgenic lines of  
613 *ONAC127* and *ONAC129* by qRT-PCR. The results showed that both genes might be  
614 activated by *ONAC127* and *ONAC129* indirectly (Supplementary Fig. S11), suggesting  
615 that *ONAC127* and *ONAC129* might activate the expression of *OsSWEET11/15* while  
616 suppress that of *OsSWEET4* simultaneously. This may explain the result that the  
617 mutants and overexpression lines almost showed the same phenotype of incompletely  
618 filled grains (Fig. 3C, D, E; Supplementary Fig. S5). Hence, it can be speculated that  
619 *ONAC127* and *ONAC129* may act as a balancer in apoplasmic transport by activating  
620 or suppressing the expression of different transporters in a dynamic way to satisfy the  
621 demand of rice seed development at different stages (Fig. 7).

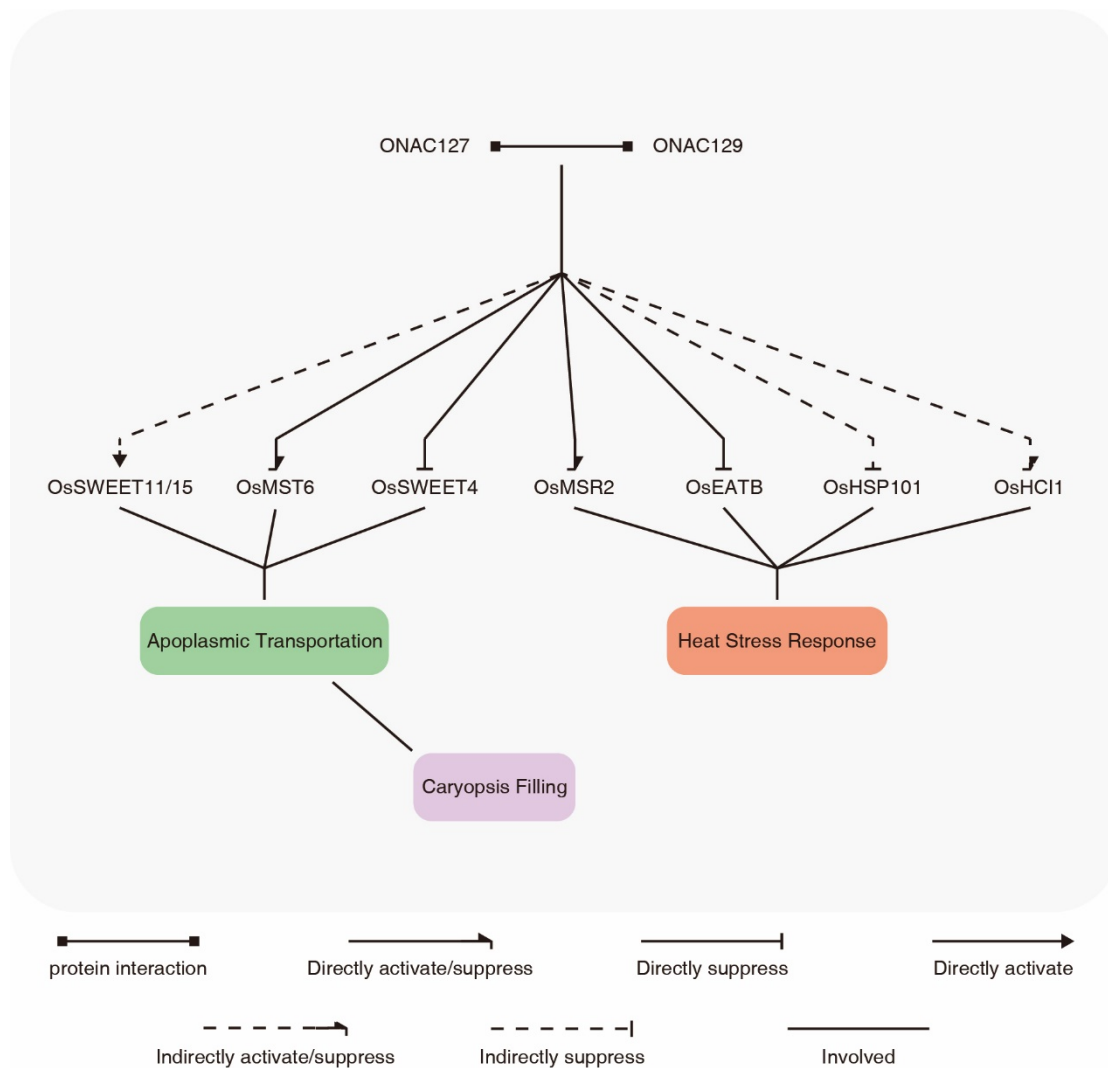

622

623 **Fig. 7. Schematic diagram of the working model of ONAC127 and ONAC129 in rice seeds.**

624 ONAC127 and ONAC129 directly regulate the expression of *OsMST6* and *OsSWEET4* to  
 625 participate in the apoplasmic transport, and *OsSWEET11* and *OsSWEET15* may also be involved  
 626 in this process as the indirect downstream transporters of them. When heat stress occurs,  
 627 ONAC127 and ONAC129 may be involved in the stress response during the filling stage by  
 628 regulating the expression of *OsMSR2* and *OsEATB* directly, while *OsHCI1* and *OsHSP101* are  
 629 regulated indirectly. ONAC127 and ONAC129 may act as the balancer of apoplasmic transport  
 630 and core transcription factors in the stress response during the early and middle stages of rice seed  
 631 development.

632 ONAC129 suppresses the transcriptional activity of ONAC127 in some pathways.  
 633 Besides, the regulation of individual ONAC127 and ONAC129 on downstream genes  
 634 may be different from that of the heterodimer formed by them (Fig. 4C; Fig. 6C). We  
 635 conjecture that the proportion of ONAC127/129 heterodimer may be vital to the balance  
 636 of the amount of apoplasmic transporters at different stages of rice seed development.  
 637 Whether it be knockout or overexpression of *ONAC127* or *ONAC129*, the proportion

638 of the monomers and dimers of ONAC127/129 will be inevitably altered, which will  
639 induce various changes in the expression of the apoplasmic transporters and further  
640 cause the defects of apoplasmic transport, leading to the phenotype of incomplete grain  
641 filling (Fig. 3C). From a macroscopic point of view, the balanced regulation of  
642 apoplasmic transport may be a “rate-limiting step” of rice reproductive growth to ensure  
643 that there are sufficient photosynthates for both grain filling and plant energy to avoid  
644 premature aging, which is vital for the plants to keep a balance between vegetative  
645 growth and reproductive growth.

#### 646 *ONAC127 and ONAC129 respond to heat stress during grain filling*

647 Heat stress has profound effects on plant growth, particularly on the reproductive  
648 development. When plants encounter heat stress, the most rapid response is the rise of  
649 cytosolic  $\text{Ca}^{2+}$  concentration (Liu *et al.*, 2003). With the increase in  $\text{Ca}^{2+}$  concentration,  
650 the expression of calmodulins (CaMs) and calmodulin-like genes (CMLs) will be  
651 activated, and the phosphorylation state of HSFs will be modulated to regulate their  
652 DNA binding ability, which thereby regulates the expression of heat stress-related genes  
653 including HSPs and some plant hormone responsive genes (Li *et al.*, 2018).

654 The proportion of incompletely filled grains under heat stress was much higher  
655 than that under normal conditions (Table 1), and the expression of *ONAC127* and  
656 *ONAC129* was induced by heat stress (Supplementary Fig. S8), suggesting that heat  
657 stress might interfere with the dimerization of ONAC127 and ONAC129 to affect the  
658 balance of apoplasmic transport. As mentioned above, ONAC127 and ONAC129  
659 regulate the expression of *OsMSR2* and *OsEATB* directly (Fig. 6C; Supplementary Fig.  
660 S10). A previous study has shown that *OsMSR2*, which can be strongly induced by heat,  
661 cold and drought stress, is a calmodulin-like protein working by binding  $\text{Ca}^{2+}$  and acts  
662 as a  $\text{Ca}^{2+}$  sensor in plant cells (Xu *et al.*, 2011). *OsEATB* is a rice AP2/ERF gene, which  
663 can suppress gibberellic acid (GA) synthesis, while the GA signaling pathway is  
664 involved in the regulation of cell elongation and morphogenesis under heat stress (Koini  
665 *et al.*, 2009, Qi *et al.*, 2011). We hereby speculate that *ONAC127* and *ONAC129* might  
666 participate in heat stress response by regulating the  $\text{Ca}^{2+}$  and GA signaling pathways.

667 The expression level of *OsHSP101* and *OsHClI* was significantly altered in the  
668 transgenic lines of *ONAC127* and *ONAC129* (Fig. 6A, C; Supplementary Fig. S11).  
669 Therefore, these two genes are also the potential target genes of ONAC127 and

670 ONAC129, though they may not be regulated directly. RING E3 ligase gene *OsHCII*  
671 is induced by heat stress and mediates nuclear-cytoplasmic trafficking of nuclear  
672 substrate proteins via mono-ubiquitination to improve the heat tolerance under heat  
673 shock (Lim *et al.*, 2013). Meanwhile, OsHSP101 functions as one of the important  
674 molecular chaperones that interact with OsHSA32 and OsHsfA2c, the latter of which  
675 is one of the central regulators of heat stress response (Singh *et al.*, 2012, Lin *et al.*,  
676 2014). Accordingly, we speculate that *ONAC127* and *ONAC129* are involved in some  
677 core reactions in heat stress response at rice seed development stage.

678  $\text{Ca}^{2+}$  is one of the most important second messengers in heat stress response, and  
679 cytosolic  $\text{Ca}^{2+}$  concentration will change rapidly when heat stress occurs (Li *et al.*,  
680 2018). The stress signals will be then transmitted by CaMs/CMLs like OsMSR2 to  
681 influence the downstream gene expression. When the downstream HSFs are activated,  
682 HSPs including OsHSP101 will be induced, resulting in the occurrence of some  
683 nuclear-cytoplasmic trafficking reactions involving OsHCII (Singh *et al.*, 2012, Lim *et*  
684 *al.*, 2013). Besides, a variety of plant hormones including GA act in heat stress response  
685 to maintain plant growth, and *OsEATB* plays an important role in GA-mediated plant  
686 cell elongation (Qi *et al.*, 2011, Li *et al.*, 2018). Since all these direct or indirect target  
687 genes of *ONAC127* and *ONAC129* play vital roles in the key steps of heat stress  
688 response regulatory network, we speculate that *ONAC127* and *ONAC129* may be core  
689 TFs in heat stress response at rice grain filling stage, and the stress and hormone  
690 response pathways may be important in the complex regulatory network of apoplasmic  
691 transport.

## 692 **Supplementary data**

693 **Fig. S1.** Expression levels of the markers for the mechanical isolation of different  
694 tissues in rice seeds.

695 **Fig. S2.** Subcellular localization of *ONAC127* and *ONAC129* in the roots of two-week-  
696 old rice seedlings of pUbi::*ONAC127*-GFP and pUbi::*ONAC129*-GFP transgenic  
697 plants.

698 **Fig. S3.** Mutation sites in *onac127*, *onac129* and *onac127;129* lines as compared with  
699 wild-type (ZH11) sequences.

700 **Fig. S4.** Relative expression levels of *ONAC127* and *ONAC129* in overexpression lines.

701 **Fig. S5.** Different stages of seed development.

702 **Fig. S6.** Relative expression levels of *ONAC127* and *ONAC129* in 7-DAP seeds of  
703 transgenic lines compared with ZH11.

704 **Fig. S7.** Ambient temperature of the growing area at rice grain filling stage.

705 **Fig. S8.** Relative expression levels of *ONAC127* and *ONAC129* in 7-DAP seeds of  
706 ZH11 under heat stress and normal conditions.

707 **Fig. S9.** Detection of FLAG fusion proteins in ZH11 and overexpression lines.

708 **Fig. S10.** Expression levels of the target genes of *ONAC127* and *ONAC129* in 7-DAP  
709 seeds of transgenic lines compared with ZH11.

710 **Fig. S11.** Expression levels of the indirect target genes of *ONAC127* and *ONAC129* in  
711 7-DAP seeds of transgenic lines compared with ZH11.

712 **Table S1.** Primers used in this study.

713 **Dataset S1.** Differentially expressed genes.

714 **Dataset S2.** Binding sites identified by ChIP-seq.

715 **Dataset S3.** Quality of Sequencing Data.

## 716 **Acknowledgements**

717 We thank Prof. Min Chen, Prof. Honghong Hu, Prof. Yidan Ouyang and Ms.  
718 Wenjing Guo for helping revise the manuscript. This research was supported by grants  
719 from the National Natural Science Foundation of China (no. 31570321). The funders  
720 had no role in the study design, data collection and analysis, the decision to publish, or  
721 in the preparation of the manuscript.

## 722 **References**

723 **Agarwal, P., Kapoor, S. and Tyagi, A.K.** (2011) Transcription factors regulating the  
724 progression of monocot and dicot seed development. *Bioessays*, **33**, 189-202.

725 **Bai, A.N., Lu, X.D., Li, D.Q., Liu, J.X. and Liu, C.M.** (2016) NF-YB1-regulated  
726 expression of sucrose transporters in aleurone facilitates sugar loading to rice  
727 endosperm. *Cell Res.*, **26**, 384-388.

728 **Chen, S., Zhang, T., Huang, Q., Chen, M., Zhao, L. and Zhang, Y.** (2019) Effects  
729 of High Temperature Injury on Seed Setting Rate from Heading to Milky Stage  
730 of Early Season Rice in Hainan. *China Tropical Agriculture*, 65-69 (in Chinese  
731 with English abstract).

732 **Chen, X., Lu, S., Wang, Y., Zhang, X., Lv, B., Luo, L., Xi, D., Shen, J., Ma, H. and**



- 733 **Ming, F.** (2015) OsNAC2 encoding a NAC transcription factor that affects plant  
734 height through mediating the gibberellic acid pathway in rice. *Plant J.*, **82**, 302-  
735 314.
- 736 **Christianson, J.A., Dennis, E.S., Llewellyn, D.J. and Wilson, I.W.** (2010) ATAF  
737 NAC transcription factors: regulators of plant stress signaling. *Plant Signal*  
738 *Behav.*, **5**, 428-432.
- 739 **Edgar, R., Domrachev, M. and Lash, A.E.** (2002) Gene Expression Omnibus: NCBI  
740 gene expression and hybridization array data repository. *Nucleic Acids Res.*, **30**,  
741 207-210.
- 742 **Fang, Y., Liao, K., Du, H., Xu, Y., Song, H., Li, X. and Xiong, L.** (2015) A stress-  
743 responsive NAC transcription factor SNAC3 confers heat and drought tolerance  
744 through modulation of reactive oxygen species in rice. *J. Exp. Bot.*, **66**, 6803-  
745 6817.
- 746 **Fang, Y., Xie, K. and Xiong, L.** (2014) Conserved miR164-targeted NAC genes  
747 negatively regulate drought resistance in rice. *J. Exp. Bot.*, **65**, 2119-2135.
- 748 **Fang, Y., You, J., Xie, K., Xie, W. and Xiong, L.** (2008) Systematic sequence analysis  
749 and identification of tissue-specific or stress-responsive genes of NAC  
750 transcription factor family in rice. *Mol. Genet. Genomics*, **280**, 547-563.
- 751 **Fujita, M., Fujita, Y., Maruyama, K., Seki, M., Hiratsu, K., Ohme-Takagi, M.,**  
752 **Tran, L.S., Yamaguchi-Shinozaki, K. and Shinozaki, K.** (2004) A  
753 dehydration-induced NAC protein, RD26, is involved in a novel ABA-  
754 dependent stress-signaling pathway. *Plant J.*, **39**, 863-876.
- 755 **Hakata, M., Wada, H., Masumoto-Kubo, C., Tanaka, R., Sato, H. and Morita, S.**  
756 (2017) Development of a new heat tolerance assay system for rice spikelet  
757 sterility. *Plant Methods*, **13**, 34.
- 758 **Hao, Y.J., Song, Q.X., Chen, H.W., Zou, H.F., Wei, W., Kang, X.S., Ma, B., Zhang,**  
759 **W.K., Zhang, J.S. and Chen, S.Y.** (2010) Plant NAC-type transcription factor  
760 proteins contain a NARD domain for repression of transcriptional activation.  
761 *Planta*, **232**, 1033-1043.
- 762 **Hoshikawa, K.** (1984) Development of Endosperm Tissue with Special Reference to  
763 the Translocation of Reserve Substances in Cereals : III. Translocation pathways  
764 in rice endosperm. *Japanese journal of crop science*, **53**, 153-162.
- 765 **Hu, H., Dai, M., Yao, J., Xiao, B., Li, X., Zhang, Q. and Xiong, L.** (2006)  
766 Overexpressing a NAM, ATAF, and CUC (NAC) transcription factor enhances

- 767 drought resistance and salt tolerance in rice. *Proc. Natl. Acad. Sci. U. S. A.*, **103**,  
768 12987-12992.
- 769 **Hu, H. and Xiong, L.** (2014) Genetic engineering and breeding of drought-resistant  
770 crops. *Annu. Rev. Plant Biol.*, **65**, 715-741.
- 771 **Huang, D., Wang, S., Zhang, B., Shang-Guan, K., Shi, Y., Zhang, D., Liu, X., Wu,**  
772 **K., Xu, Z., Fu, X. and Zhou, Y.** (2015) A Gibberellin-Mediated DELLA-NAC  
773 Signaling Cascade Regulates Cellulose Synthesis in Rice. *Plant Cell*, **27**, 1681-  
774 1696.
- 775 **Ishimaru, T., Ida, M., Hirose, S., Shimamura, S., Masumura, T., Nishizawa, N.K.,**  
776 **Nakazono, M. and Kondo, M.** (2015) Laser microdissection-based gene  
777 expression analysis in the aleurone layer and starchy endosperm of developing  
778 rice caryopses in the early storage phase. *Rice (N Y)*, **8**, 57.
- 779 **Kawahara, Y., de la Bastide, M., Hamilton, J.P., Kanamori, H., McCombie, W.R.,**  
780 **Ouyang, S., Schwartz, D.C., Tanaka, T., Wu, J., Zhou, S., Childs, K.L.,**  
781 **Davidson, R.M., Lin, H., Quesada-Ocampo, L., Vaillancourt, B., Sakai, H.,**  
782 **Lee, S.S., Kim, J., Numa, H., Itoh, T., Buell, C.R. and Matsumoto, T.** (2013)  
783 Improvement of the *Oryza sativa* Nipponbare reference genome using next  
784 generation sequence and optical map data. *Rice (N Y)*, **6**, 4.
- 785 **Kim, D., Langmead, B. and Salzberg, S.L.** (2015) HISAT: a fast spliced aligner with  
786 low memory requirements. *Nat. Methods*, **12**, 357-360.
- 787 **Koini, M.A., Alvey, L., Allen, T., Tilley, C.A., Harberd, N.P., Whitelam, G.C. and**  
788 **Franklin, K.A.** (2009) High temperature-mediated adaptations in plant  
789 architecture require the bHLH transcription factor PIF4. *Curr. Biol.*, **19**, 408-  
790 413.
- 791 **Kouchi, H. and Hata, S.** (1993) Isolation and characterization of novel nodulin cDNAs  
792 representing genes expressed at early stages of soybean nodule development.  
793 *Mol. Gen. Genet.*, **238**, 106-119.
- 794 **Li, B., Gao, K., Ren, H. and Tang, W.** (2018) Molecular mechanisms governing plant  
795 responses to high temperatures. *J. Integr. Plant Biol.*, **60**, 757-779.
- 796 **Li, H. and Durbin, R.** (2009) Fast and accurate short read alignment with Burrows-  
797 Wheeler transform. *Bioinformatics*, **25**, 1754-1760.
- 798 **Lim, S.D., Cho, H.Y., Park, Y.C., Ham, D.J., Lee, J.K. and Jang, C.S.** (2013) The  
799 rice RING finger E3 ligase, OsHCI1, drives nuclear export of multiple substrate  
800 proteins and its heterogeneous overexpression enhances acquired

- 801 thermotolerance. *J. Exp. Bot.*, **64**, 2899-2914.
- 802 **Lin, M.Y., Chai, K.H., Ko, S.S., Kuang, L.Y., Lur, H.S. and Charng, Y.Y.** (2014) A  
803 positive feedback loop between HEAT SHOCK PROTEIN101 and HEAT  
804 STRESS-ASSOCIATED 32-KD PROTEIN modulates long-term acquired  
805 thermotolerance illustrating diverse heat stress responses in rice varieties. *Plant*  
806 *Physiol.*, **164**, 2045-2053.
- 807 **Lin, Y.J. and Zhang, Q.** (2005) Optimising the tissue culture conditions for high  
808 efficiency transformation of indica rice. *Plant Cell Rep*, **23**, 540-547.
- 809 **Lindemose, S., Jensen, M.K., Van de Velde, J., O'Shea, C., Heyndrickx, K.S.,**  
810 **Workman, C.T., Vandepoele, K., Skriver, K. and De Masi, F.** (2014) A DNA-  
811 binding-site landscape and regulatory network analysis for NAC transcription  
812 factors in *Arabidopsis thaliana*. *Nucleic Acids Res.*, **42**, 7681-7693.
- 813 **Liu, H., Ding, Y., Zhou, Y., Jin, W., Xie, K. and Chen, L.L.** (2017) CRISPR-P 2.0:  
814 An Improved CRISPR-Cas9 Tool for Genome Editing in Plants. *Mol Plant*, **10**,  
815 530-532.
- 816 **Liu, H.T., Li, B., Shang, Z.L., Li, X.Z., Mu, R.L., Sun, D.Y. and Zhou, R.G.** (2003)  
817 Calmodulin is involved in heat shock signal transduction in wheat. *Plant*  
818 *Physiol.*, **132**, 1186-1195.
- 819 **Liu, W., Xie, X., Ma, X., Li, J., Chen, J. and Liu, Y.G.** (2015) DSDecode: A Web-  
820 Based Tool for Decoding of Sequencing Chromatograms for Genotyping of  
821 Targeted Mutations. *Mol Plant*, **8**, 1431-1433.
- 822 **Livak, K.J. and Schmittgen, T.D.** (2001) Analysis of relative gene expression data  
823 using real-time quantitative PCR and the 2(-Delta Delta C(T)) Method. *Methods*,  
824 **25**, 402-408.
- 825 **Love, M.I., Huber, W. and Anders, S.** (2014) Moderated estimation of fold change  
826 and dispersion for RNA-seq data with DESeq2. *Genome Biol.*, **15**.
- 827 **Lu, K., Li, T., He, J., Chang, W., Zhang, R., Liu, M., Yu, M., Fan, Y., Ma, J., Sun,**  
828 **W., Qu, C., Liu, L., Li, N., Liang, Y., Wang, R., Qian, W., Tang, Z., Xu, X.,**  
829 **Lei, B., Zhang, K. and Li, J.** (2018) qPrimerDB: a thermodynamics-based  
830 gene-specific qPCR primer database for 147 organisms. *Nucleic Acids Res.*, **46**,  
831 D1229-D1236.
- 832 **Ma, X., Zhang, Q., Zhu, Q., Liu, W., Chen, Y., Qiu, R., Wang, B., Yang, Z., Li, H.,**  
833 **Lin, Y., Xie, Y., Shen, R., Chen, S., Wang, Z., Chen, Y., Guo, J., Chen, L.,**  
834 **Zhao, X., Dong, Z. and Liu, Y.G.** (2015) A Robust CRISPR/Cas9 System for

- 835 Convenient, High-Efficiency Multiplex Genome Editing in Monocot and Dicot  
836 Plants. *Mol Plant*, **8**, 1274-1284.
- 837 **Machanick, P. and Bailey, T.L.** (2011) MEME-ChIP: motif analysis of large DNA  
838 datasets. *Bioinformatics*, **27**, 1696-1697.
- 839 **Mao, C., Ding, W., Wu, Y., Yu, J., He, X., Shou, H. and Wu, P.** (2007)  
840 Overexpression of a NAC-domain protein promotes shoot branching in rice.  
841 *New Phytol.*, **176**, 288-298.
- 842 **Mathew, I.E., Das, S., Mahto, A. and Agarwal, P.** (2016) Three Rice NAC  
843 Transcription Factors Heteromerize and Are Associated with Seed Size. *Front*  
844 *Plant Sci*, **7**, 1638.
- 845 **Matsuda, T., Kawahara, H. and Chonan, N.** (1979) Histo-Cytological Researches on  
846 Translocation and Ripening in Rice Ovary : I. Histological changes and transfer  
847 pathways in the developing ovary. *Japanese journal of crop science*, **48**, 155-  
848 162.
- 849 **Nuruzzaman, M., Manimekalai, R., Sharoni, A.M., Satoh, K., Kondoh, H., Ooka,**  
850 **H. and Kikuchi, S.** (2010) Genome-wide analysis of NAC transcription factor  
851 family in rice. *Gene*, **465**, 30-44.
- 852 **Olsen, A.N., Ernst, H.A., Leggio, L.L. and Skriver, K.** (2005) DNA-binding  
853 specificity and molecular functions of NAC transcription factors. *Plant Sci.*, **169**,  
854 785-797.
- 855 **Ooka, H., Satoh, K., Doi, K., Nagata, T., Otomo, Y., Murakami, K., Matsubara, K.,**  
856 **Osato, N., Kawai, J., Carninci, P., Hayashizaki, Y., Suzuki, K., Kojima, K.,**  
857 **Takahara, Y., Yamamoto, K. and Kikuchi, S.** (2003) Comprehensive analysis  
858 of NAC family genes in *Oryza sativa* and *Arabidopsis thaliana*. *DNA Res.*, **10**,  
859 239-247.
- 860 **Oono, Y., Wakasa, Y., Hirose, S., Yang, L., Sakuta, C. and Takaiwa, F.** (2010)  
861 Analysis of ER stress in developing rice endosperm accumulating beta-amyloid  
862 peptide. *Plant Biotechnol. J.*, **8**, 691-718.
- 863 **Oparka, K.J. and Gates, P.** (1981) Transport of assimilates in the developing caryopsis  
864 of rice (*Oryza sativa* L.) : The pathways of water and assimilated carbon. *Planta*,  
865 **152**, 388-396.
- 866 **Patrick, J.W.** (1997) PHLOEM UNLOADING: Sieve Element Unloading and Post-  
867 Sieve Element Transport. *Annu. Rev. Plant Physiol. Plant Mol. Biol.*, **48**, 191-  
868 222.

- 869 **Qi, W., Sun, F., Wang, Q., Chen, M., Huang, Y., Feng, Y.Q., Luo, X. and Yang, J.**  
870 (2011) Rice ethylene-response AP2/ERF factor OsEATB restricts internode  
871 elongation by down-regulating a gibberellin biosynthetic gene. *Plant Physiol.*,  
872 **157**, 216-228.
- 873 **Robinson, J.T., Thorvaldsdottir, H., Winckler, W., Guttman, M., Lander, E.S.,**  
874 **Getz, G. and Mesirov, J.P.** (2011) Integrative genomics viewer. *Nat.*  
875 *Biotechnol.*, **29**, 24-26.
- 876 **Schramm, F., Larkindale, J., Kiehlmann, E., Ganguli, A., Englich, G., Vierling, E.**  
877 **and von Koskull-Doring, P.** (2008) A cascade of transcription factor DREB2A  
878 and heat stress transcription factor HsfA3 regulates the heat stress response of  
879 *Arabidopsis*. *Plant J.*, **53**, 264-274.
- 880 **Shen, J., Liu, J., Xie, K., Xing, F., Xiong, F., Xiao, J., Li, X. and Xiong, L.** (2017a)  
881 Translational repression by a miniature inverted-repeat transposable element in  
882 the 3' untranslated region. *Nat Commun*, **8**, 14651.
- 883 **Shen, J., Lv, B., Luo, L., He, J., Mao, C., Xi, D. and Ming, F.** (2017b) The NAC-type  
884 transcription factor OsNAC2 regulates ABA-dependent genes and abiotic stress  
885 tolerance in rice. *Sci. Rep.*, **7**, 40641.
- 886 **Singh, A., Mittal, D., Lavania, D., Agarwal, M., Mishra, R.C. and Grover, A.** (2012)  
887 OsHsfA2c and OsHsfB4b are involved in the transcriptional regulation of  
888 cytoplasmic OsClpB (Hsp100) gene in rice (*Oryza sativa* L.). *Cell Stress*  
889 *Chaperones*, **17**, 243-254.
- 890 **Sosso, D., Luo, D., Li, Q.B., Sasse, J., Yang, J., Gendrot, G., Suzuki, M., Koch, K.E.,**  
891 **McCarty, D.R., Chourey, P.S., Rogowsky, P.M., Ross-Ibarra, J., Yang, B.**  
892 **and Frommer, W.B.** (2015) Seed filling in domesticated maize and rice  
893 depends on SWEET-mediated hexose transport. *Nat. Genet.*, **47**, 1489-1493.
- 894 **Waadt, R., Schmidt, L.K., Lohse, M., Hashimoto, K., Bock, R. and Kudla, J.** (2008)  
895 Multicolor bimolecular fluorescence complementation reveals simultaneous  
896 formation of alternative CBL/CIPK complexes in planta. *Plant J.*, **56**, 505-516.
- 897 **Walter, M., Chaban, C., Schutze, K., Batistic, O., Weckermann, K., Nake, C.,**  
898 **Blazevic, D., Grefen, C., Schumacher, K., Oecking, C., Harter, K. and**  
899 **Kudla, J.** (2004) Visualization of protein interactions in living plant cells using  
900 bimolecular fluorescence complementation. *Plant J.*, **40**, 428-438.
- 901 **Wang, L., Xie, W., Chen, Y., Tang, W., Yang, J., Ye, R., Liu, L., Lin, Y., Xu, C., Xiao,**  
902 **J. and Zhang, Q.** (2010) A dynamic gene expression atlas covering the entire

- 903 life cycle of rice. *Plant J.*, **61**, 752-766.
- 904 **Wang, L., Zhou, Z., Song, X., Li, J., Deng, X. and Mei, F.** (2008a) Evidence of ceased  
905 programmed cell death in metaphloem sieve elements in the developing  
906 caryopsis of *Triticum aestivum* L. *Protoplasma*, **234**, 87-96.
- 907 **Wang, Y., Xiao, Y., Zhang, Y., Chai, C., Wei, G., Wei, X., Xu, H., Wang, M.,**  
908 **Ouwerkerk, P.B. and Zhu, Z.** (2008b) Molecular cloning, functional  
909 characterization and expression analysis of a novel monosaccharide transporter  
910 gene OsMST6 from rice (*Oryza sativa* L.). *Planta*, **228**, 525-535.
- 911 **Wu, X., Liu, J., Li, D. and Liu, C.M.** (2016) Rice caryopsis development II: Dynamic  
912 changes in the endosperm. *J. Integr. Plant Biol.*, **58**, 786-798.
- 913 **Xiong, Y., Ren, Y., Li, W., Wu, F., Yang, W., Huang, X. and Yao, J.** (2019) NF-YC12  
914 is a key multi-functional regulator of accumulation of seed storage substances  
915 in rice. *J. Exp. Bot.*, **70**, 3765-3780.
- 916 **Xu, G.Y., Rocha, P.S., Wang, M.L., Xu, M.L., Cui, Y.C., Li, L.Y., Zhu, Y.X. and**  
917 **Xia, X.** (2011) A novel rice calmodulin-like gene, OsMSR2, enhances drought  
918 and salt tolerance and increases ABA sensitivity in *Arabidopsis*. *Planta*, **234**,  
919 47-59.
- 920 **Xue, W., Xing, Y., Weng, X., Zhao, Y., Tang, W., Wang, L., Zhou, H., Yu, S., Xu, C.,**  
921 **Li, X. and Zhang, Q.** (2008) Natural variation in *Ghd7* is an important regulator  
922 of heading date and yield potential in rice. *Nat. Genet.*, **40**, 761-767.
- 923 **Yamaguchi, M., Ohtani, M., Mitsuda, N., Kubo, M., Ohme-Takagi, M., Fukuda,**  
924 **H. and Demura, T.** (2010) VND-INTERACTING2, a NAC domain  
925 transcription factor, negatively regulates xylem vessel formation in *Arabidopsis*.  
926 *Plant Cell*, **22**, 1249-1263.
- 927 **Yang, J., Luo, D., Yang, B., Frommer, W.B. and Eom, J.S.** (2018) SWEET11 and 15  
928 as key players in seed filling in rice. *New Phytol.*
- 929 **Yang, S.D., Seo, P.J., Yoon, H.K. and Park, C.M.** (2011) The *Arabidopsis* NAC  
930 transcription factor VNI2 integrates abscisic acid signals into leaf senescence  
931 via the COR/RD genes. *Plant Cell*, **23**, 2155-2168.
- 932 **Young, M.D., Wakefield, M.J., Smyth, G.K. and Oshlack, A.** (2010) Gene ontology  
933 analysis for RNA-seq: accounting for selection bias. *Genome Biol.*, **11**, R14.
- 934 **Zhang, Y., Liu, T., Meyer, C.A., Eeckhoute, J., Johnson, D.S., Bernstein, B.E.,**  
935 **Nusbaum, C., Myers, R.M., Brown, M., Li, W. and Liu, X.S.** (2008) Model-  
936 based analysis of ChIP-Seq (MACS). *Genome Biol.*, **9**, R137.

937 **Zhang, Z., Dong, J., Ji, C., Wu, Y. and Messing, J.** (2019) NAC-type transcription  
938 factors regulate accumulation of starch and protein in maize seeds. *Proc. Natl.*  
939 *Acad. Sci. U. S. A.*, **116**, 11223-11228.
