# Supplementary material for: A Heat Stress Responsive NAC Transcription Factor Heterodimer Plays Key Roles in Rice Grain Filling
Source: bioRxiv or medRxiv preprint supplement (doi:10.1101/2020.02.08.939728), 2020-06-27
Supplement: Supplementary file [file media-1.pdf]

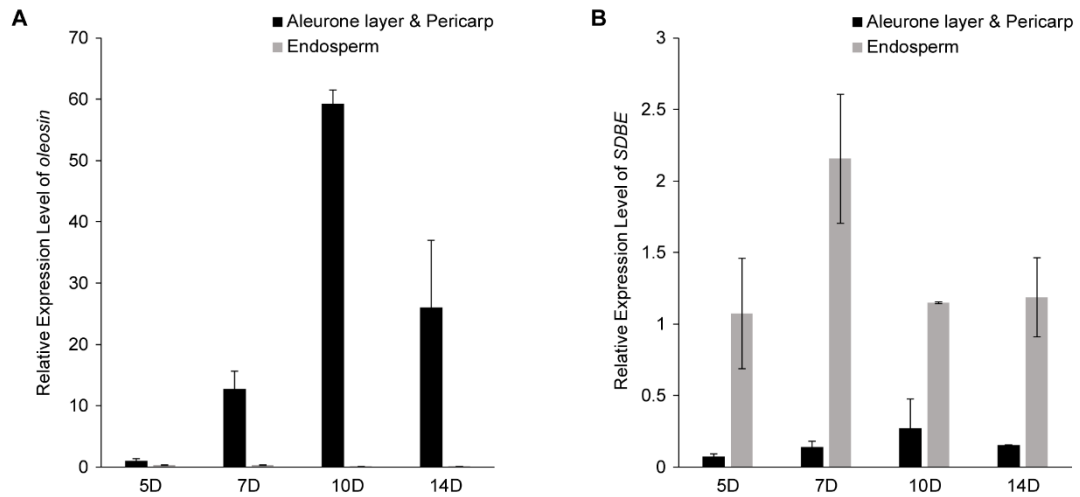

**Supplemental Fig. S1** Expression level of mechanical isolation marker in isolated tissue. A. Aleurone layer marker *oleosin*. B. Endosperm marker *SDBE*. 5-14D, total RNA was extracted from caryopses collected during 5-14 DAP. The values in each column are the mean of three technical replicates and the error bars indicate the  $\pm$ SD. Ubiquitin is used as the reference gene.

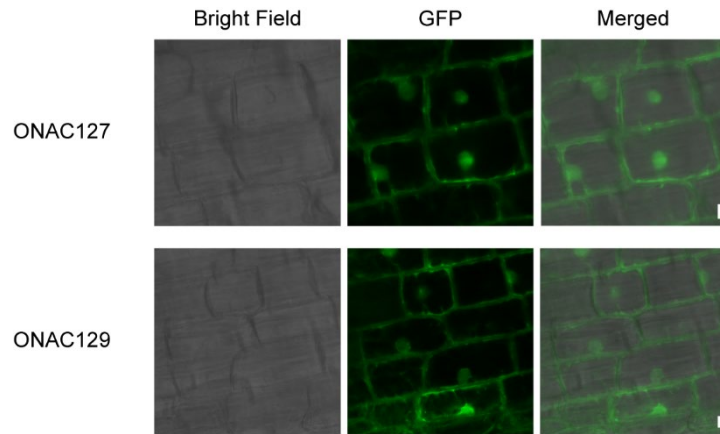

**Supplemental Fig. S2** Subcellular localization of the ONAC127 and ONAC129 in the roots of two-week-old rice seedlings of pUbi::ONAC127-GFP and pUbi::ONAC129-GFP transgenic plants. Scale bars are 5  $\mu$ m.

| ONAC127              |                          | ONAC129              |                          |
|----------------------|--------------------------|----------------------|--------------------------|
| <i>onac127-1</i>     | CCTTGG--TTCCACTACGGGAAT  | <i>onac129-1</i>     | CCCTCTAGAATTCATTTGTGATGT |
| ZH11                 | CCTTGGTATTCCACTACGGGAAT  | ZH11                 | CCCTCT-GAATTCATTTGTGATGT |
| <i>onac127-2</i>     | CCTTGGTTATTCCACTACGGGAAT | <i>onac129-2</i>     | ACGTTCTTCCTCATA--CCATGG  |
| ZH11                 | CCTTGG-TATTCCACTACGGGAAT | ZH11                 | ACGTTCTTCCTCATAACCCATGG  |
| <i>onac127-3</i>     | CCCTGTGGACTTCATCACCAACGT | <i>onac129-3</i>     | ACGTTCTTCCTCATAA-CCATGG  |
| ZH11                 | CCCTGT-GACTTCATCACCAACGT | ZH11                 | ACGTTCTTCCTCATAACCCATGG  |
| <hr/>                |                          |                      |                          |
| <i>onac127;129-1</i> | CCGTGC-----GATGGGTTCT    | <i>onac127;129-1</i> | GGGCATGTCACACCC--CCGAGG  |
| ZH11                 | CCGTGCTGCTGGTGATGGGTTCT  | ZH11                 | GGGCATGTCACACCCCACCGAGG  |
| <i>onac127;129-2</i> | CCGTGC-GCTGGTGATGGGTTCT  | <i>onac127;129-2</i> | GGGCATGTCACACCCCAACCGAGG |
| ZH11                 | CCGTGCTGCTGGTGATGGGTTCT  | ZH11                 | GGGCATGTCACACCCC-ACCGAGG |
| <i>onac127;129-3</i> | CCCTG----TTCATCACCAACGTC | <i>onac127;129-3</i> | CCCCGC--TGGGCATGTCACACC  |
| ZH11                 | CCCTGTGACTTCATCACCAACGTC | ZH11                 | CCCCGCTGTGGGCATGTCACACC  |

**Supplemental Fig. S3** Mutation sites in *onac127*, *onac129* and *onac127;129* lines, as compared with wild-type (ZH11) sequences. The protospacer-adjacent motif sequences are shown in orange and the inserted or deleted nucleotides are indicated in red.

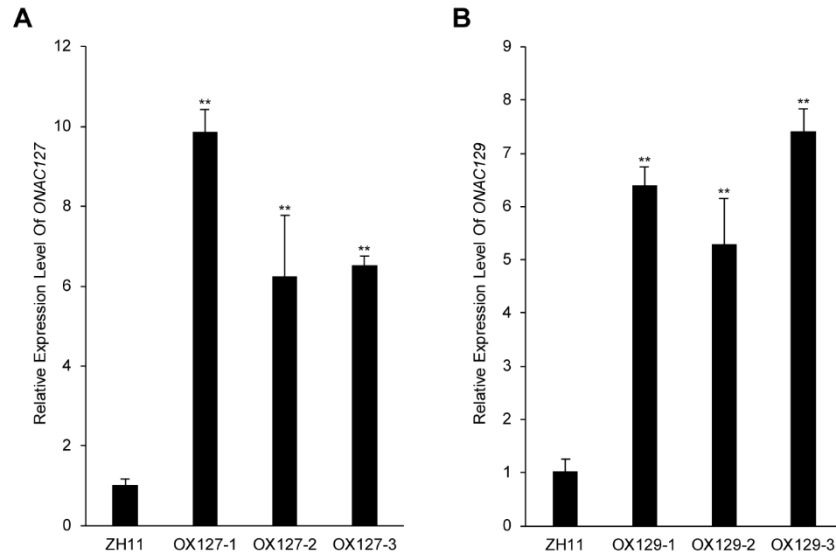

**Supplemental Fig. S4** The relative expression level of the overexpression lines of *ONAC127* and *ONAC129*. The values in each column are the mean ( $\pm$ SD) of three biological replicates. Ubiquitin is used as the reference gene. Significant differences between the ZH11 and the overexpression lines are determined using Student's t-test (\*\*  $P < 0.01$ ).

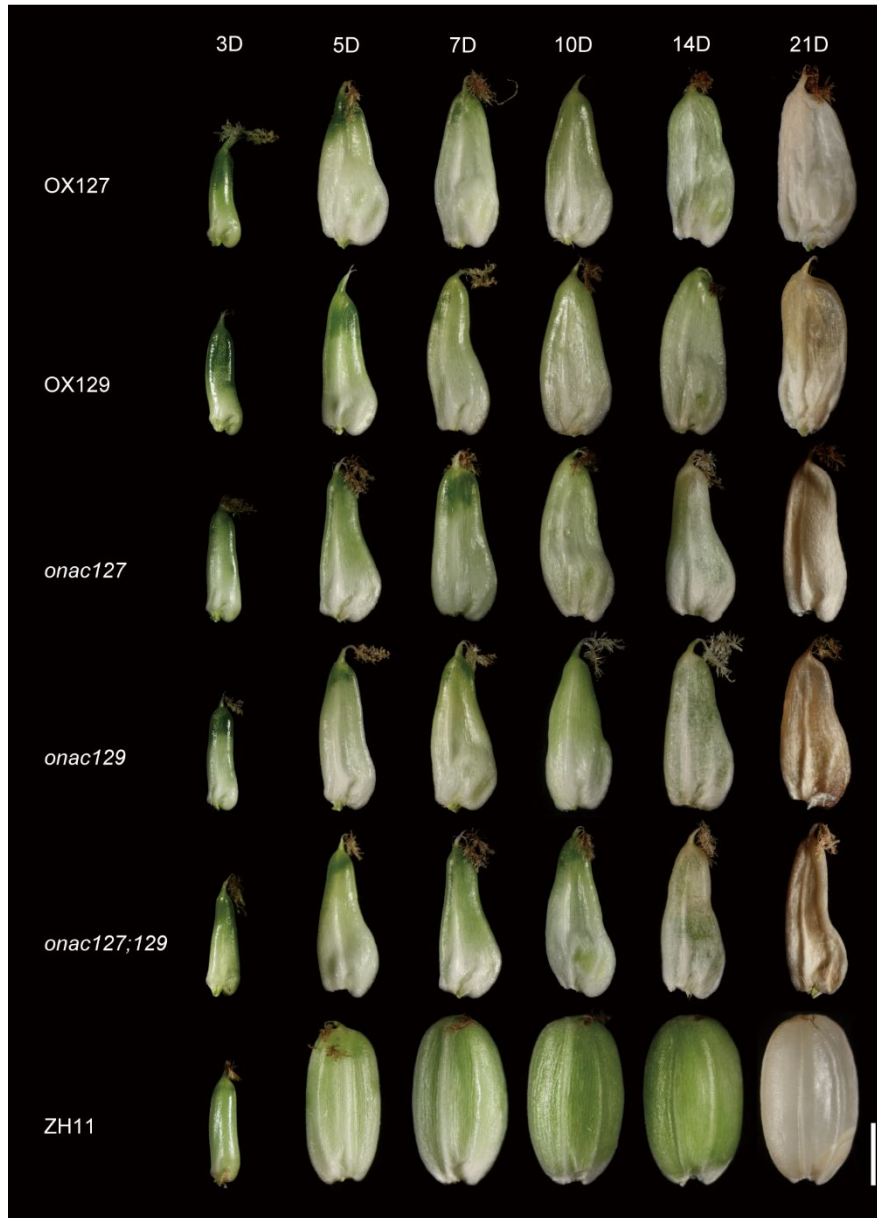

**Supplemental Fig. S5** Different stages of caryopses development. Scale bar is 2 mm.

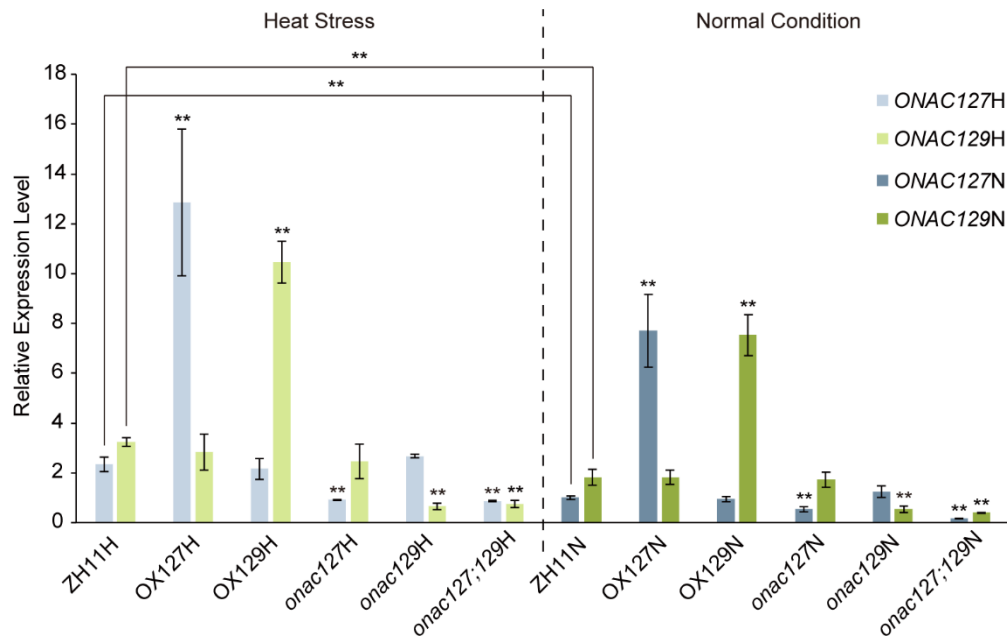

**Supplemental Fig. S6** Expression level of *ONAC127* and *ONAC129* in 7 DAP caryopses of transgenic lines compared with that of ZH11. Ubiquitin was used as the reference gene. The values in each column are the mean ( $\pm$ SD) of three replicates. Significant differences between the ZH11 and the transgenic lines were determined using Student's t-test (\*\*  $P < 0.01$ ).

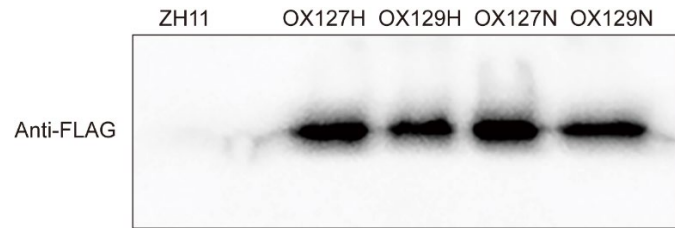

**Supplemental Fig. S7** Detection of FLAG fusion proteins in the ZH11 and overexpression lines. Total proteins extracted from developing caryopses at 7 DAP were used for western blot analyses with an anti-FLAG antibody.

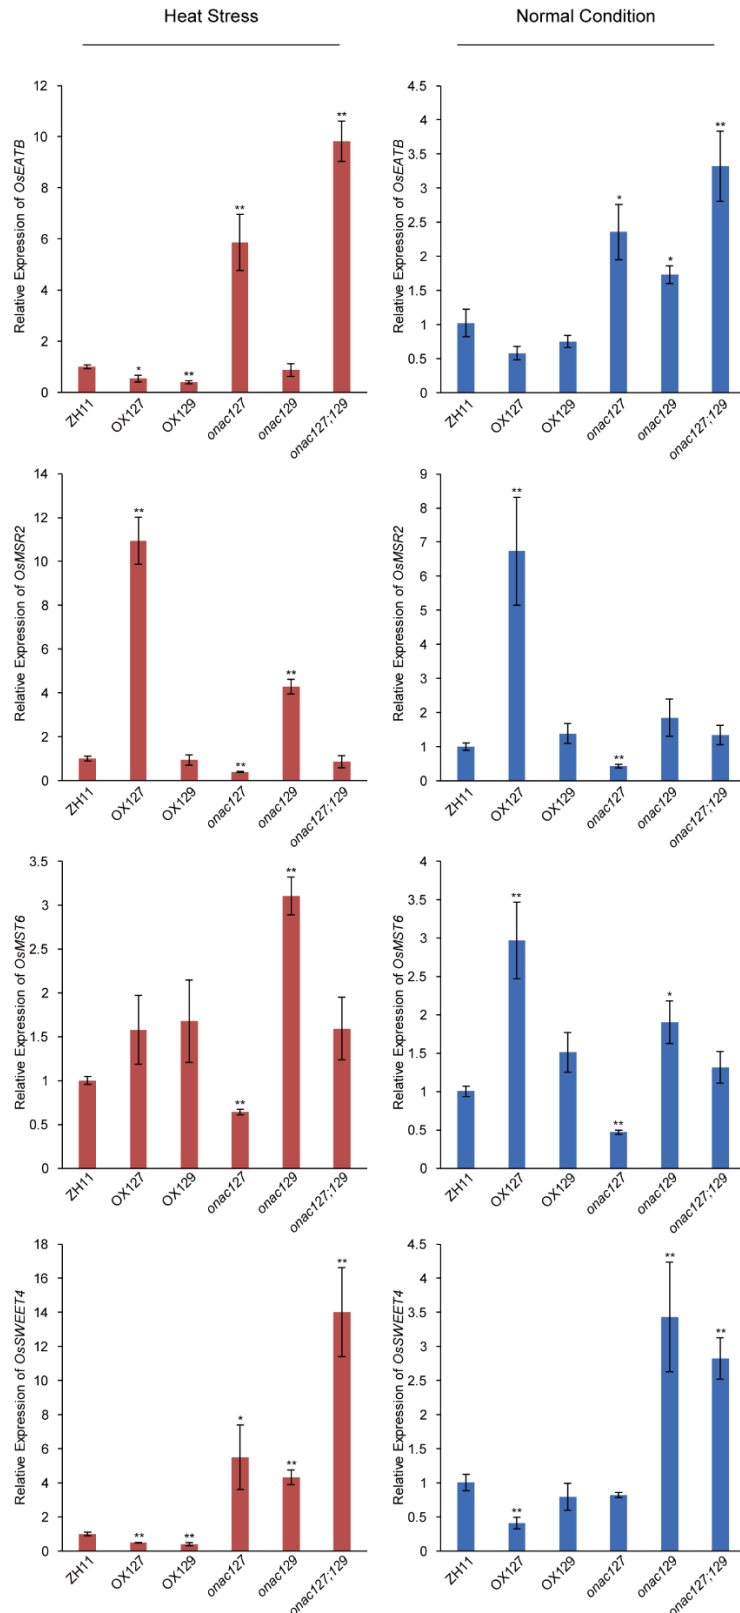

**Supplemental Fig. S8** Expression level of the target genes of ONAC127 and ONAC129 in 7 DAP caryopses of transgenic lines compared with that of ZH11. Ubiquitin was used as the reference gene. The values in each column are the mean ( $\pm$ SD) of three replicates. Significant differences between the ZH11 and the overexpression lines were determined using Student's t-test (\*  $P < 0.05$ ; \*\*  $P < 0.01$ ).



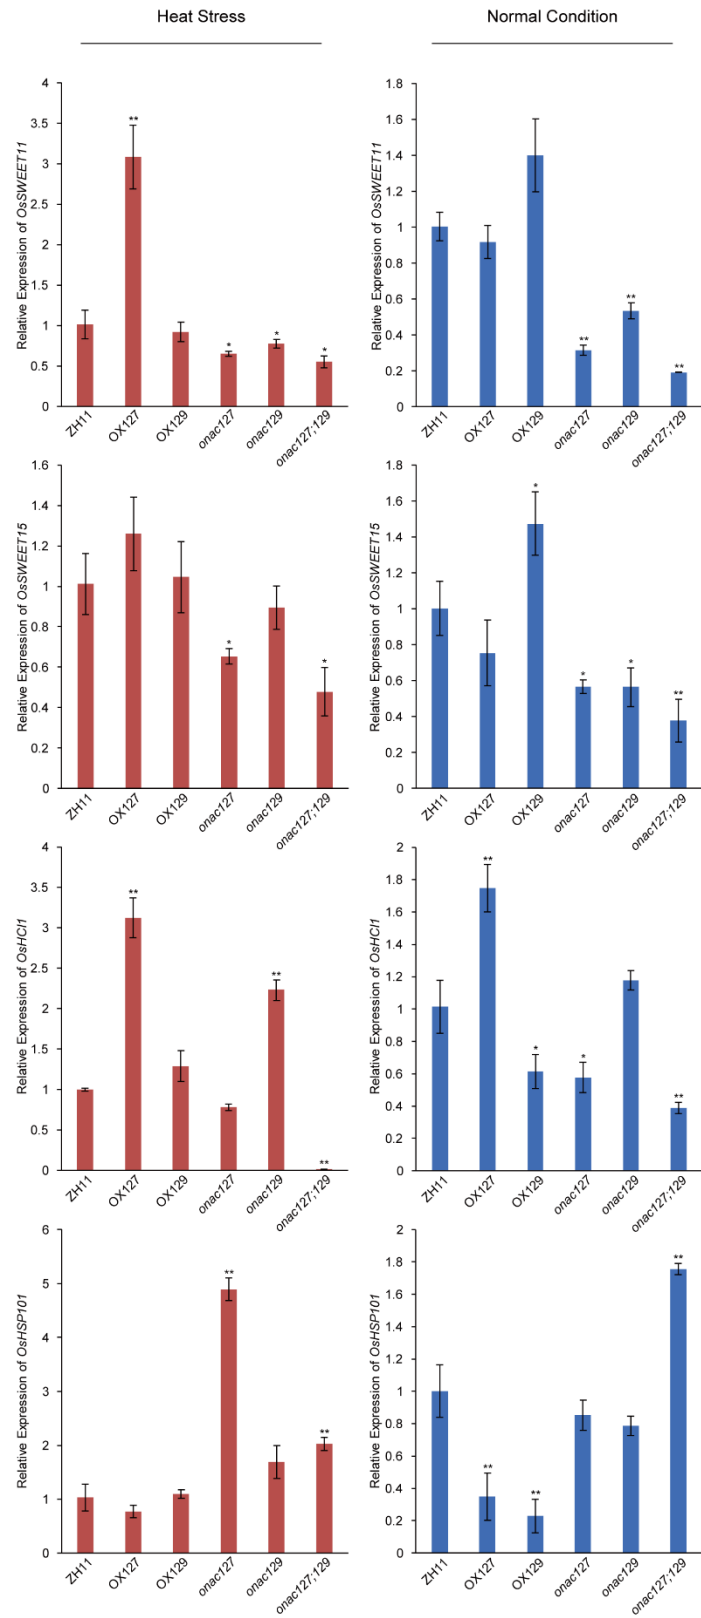

**Supplemental Fig. S9** Expression level of the indirect target genes of ONAC127 and ONAC129 in 7 DAP caryopses of transgenic lines compared with that of ZH11. Ubiquitin is used as the reference gene. The values in each column are the mean ( $\pm$ SD) of three replicates. Significant differences between the ZH11 and the overexpression lines are determined using Student's t-test (\*  $P < 0.05$ ; \*\*  $P < 0.01$ ).
